# Supplementary material for: N-Hydroxy-N-Propargylamide Derivatives of Ferulic Acid: Inhibitors of Cholinesterases and Monoamine Oxidases
Source: MDPI journal article supplement (doi:10.3390/molecules27217437), 2022-11-01

# **Supplementary Material**

## **CONTENT**

**1. NMR, IR and HRMS spectra of compounds 1–6, 15 and 16.....S2–S38**

**1. NMR, IR and HRMS spectra of compounds 1–6, 15 and 16**

**Compound 1**

## <sup>1</sup>H NMR

## <sup>13</sup>C NMR

MBA3\_MeOD\_1H\_200117  
MBA3 en MeOD  
1H

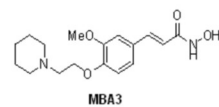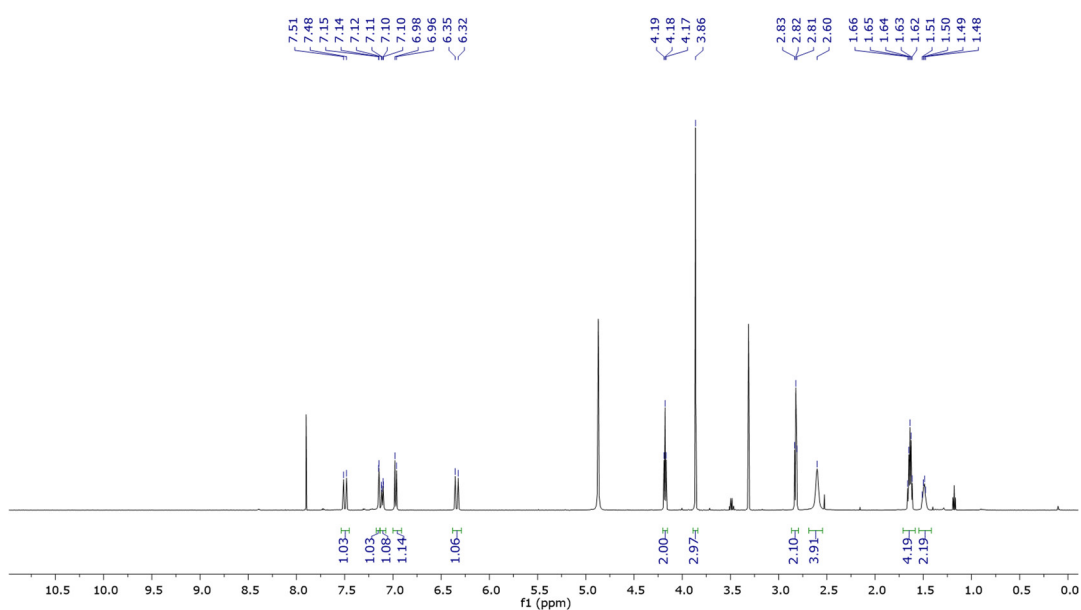

MBA3\_MeOD\_13C\_200117  
MBA3 en MeOD  
13C

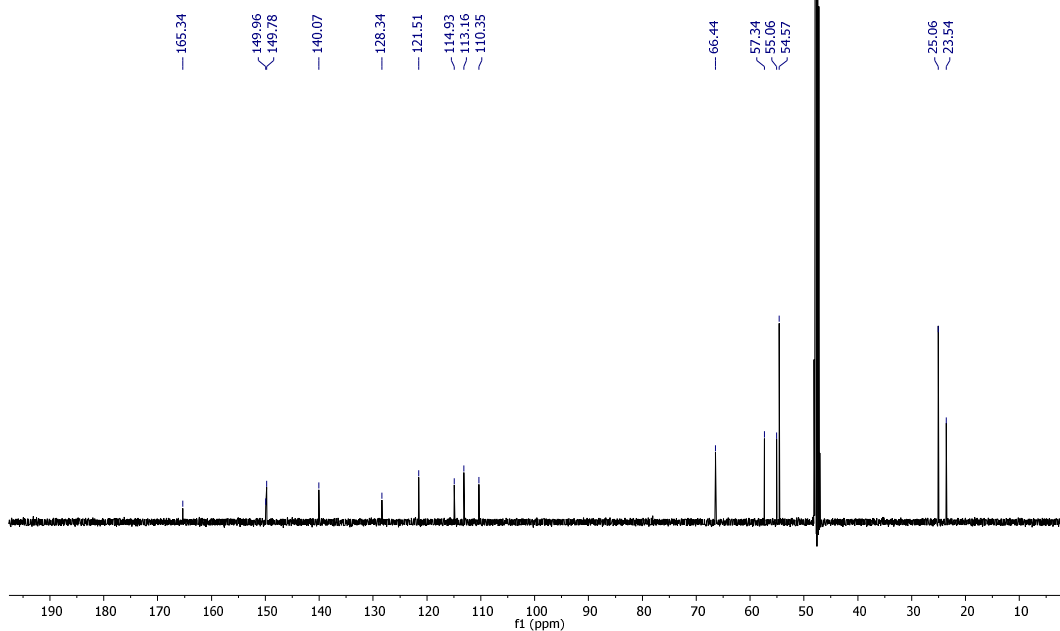

## 2D COSY NMR

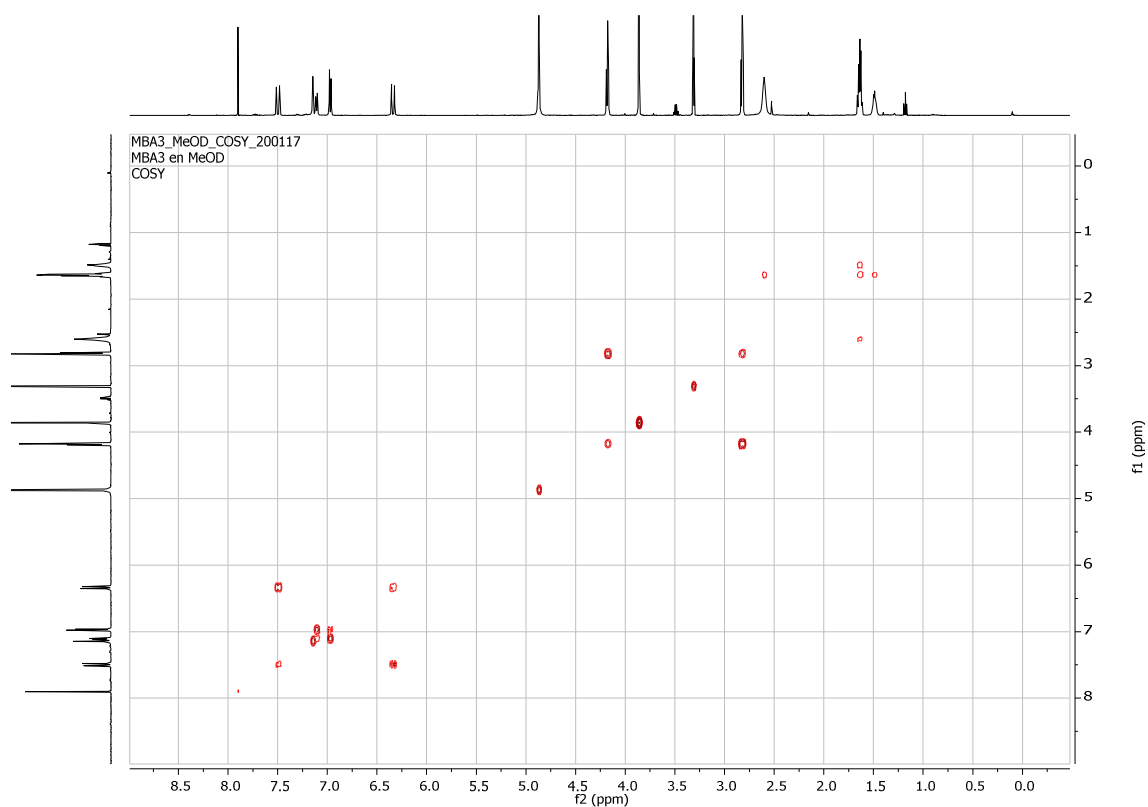

## 2D HSQC NMR

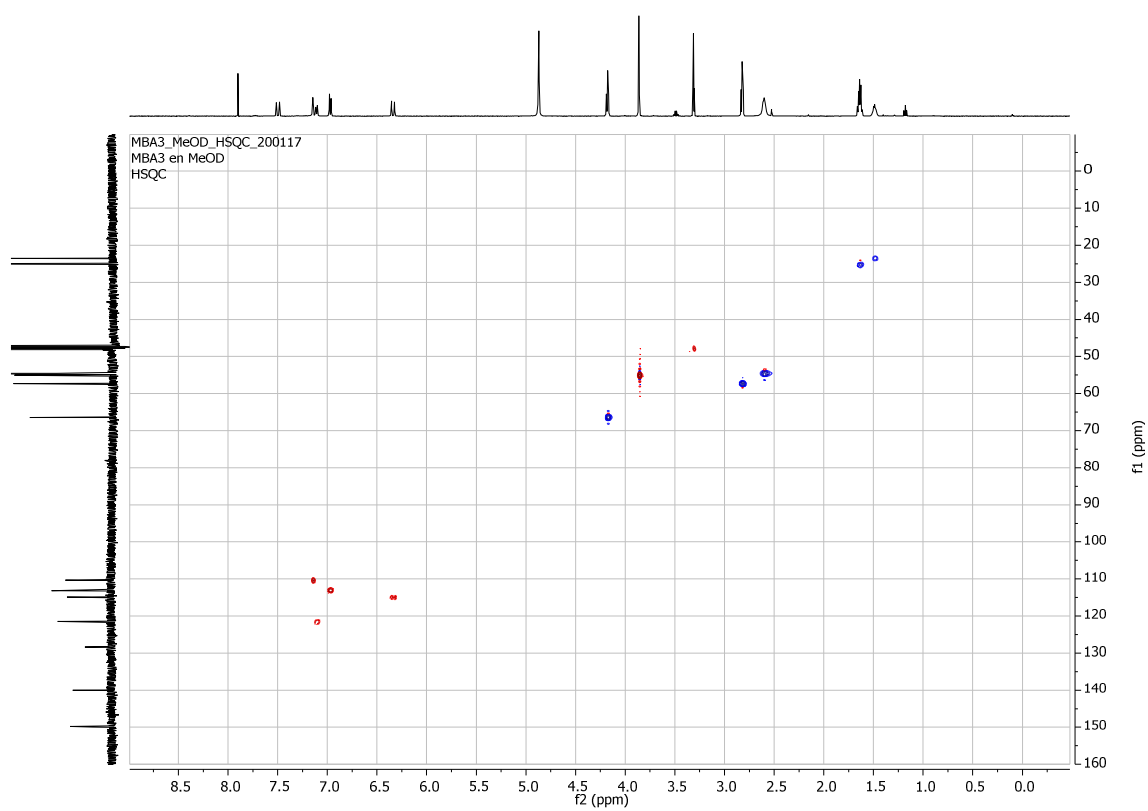

## 2D HMBC NMR

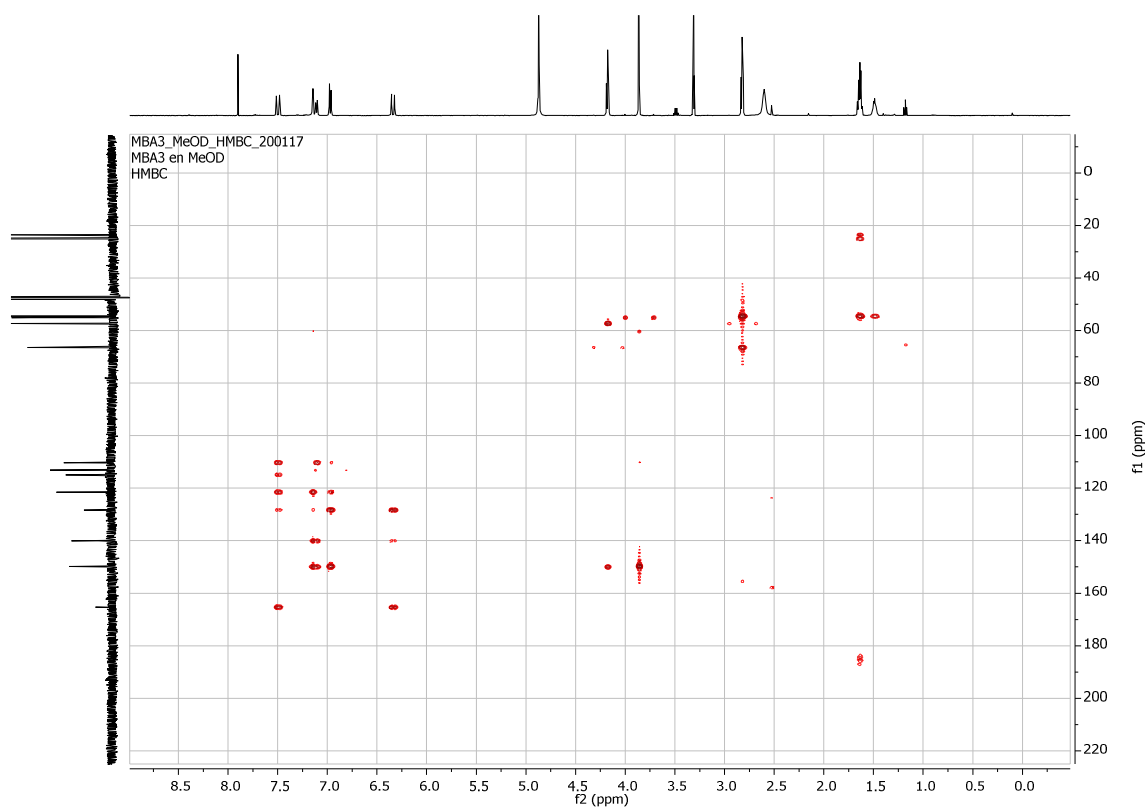

## FTIR

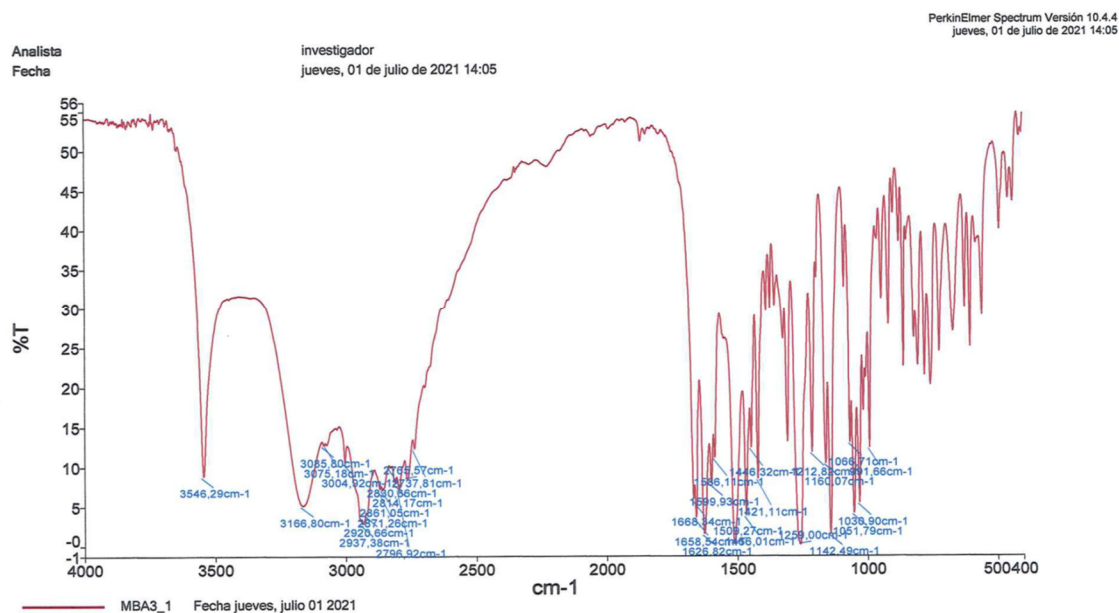

## HRMS



## Qualitative Compound Report

|                        |                      |               |                                  |
|------------------------|----------------------|---------------|----------------------------------|
| Data File              | 247_MBA3_02.d        | Sample Name   | MBA3                             |
| Sample Type            | Sample               | Position      | Vial 1                           |
| Instrument Name        | Instrument 1         | User Name     |                                  |
| Acq Method             | ESI_ACN_75_pos_new.m | Acquired Time | 2/19/2021 1:23:41 PM (UTC+01:00) |
| IRM Calibration Status | Success              | DA Method     | Defecto_modificado.m             |
| Comment                |                      |               |                                  |

|                          |                                  |                        |                                                         |
|--------------------------|----------------------------------|------------------------|---------------------------------------------------------|
| Sample Group             |                                  | Info.                  |                                                         |
| User                     | DANIEL DIEZ                      | Stream Name            | LC 1                                                    |
| Acquisition Time (Local) | 2/19/2021 1:23:41 PM (UTC+01:00) | Acquisition SW Version | 6200 series TOF/6500 series Q-TOF B.08.00 (B8058.3 SP1) |
| QTOF Driver Version      | 8.00.00                          | QTOF Firmware Version  | 2.712                                                   |
| Tune Mass Range          | 1700                             |                        |                                                         |
| Max.                     |                                  |                        |                                                         |

### Compound Table

| Compound Label              | RT    | Mass     | Abund    | Formula       | Tgt Mass | Diff (ppm) | Hits (DB) |
|-----------------------------|-------|----------|----------|---------------|----------|------------|-----------|
| Cpd 1: C17 H24 N2 O4; 0.837 | 0.837 | 320.1739 | 15628177 | C17 H24 N2 O4 | 320.1736 | 0.84       | 1         |

| Compound Label              | m/z     | RT    | Algorithm       | Mass     |
|-----------------------------|---------|-------|-----------------|----------|
| Cpd 1: C17 H24 N2 O4; 0.837 | 321.181 | 0.837 | Find by Formula | 320.1739 |

### MS Zoomed Spectrum

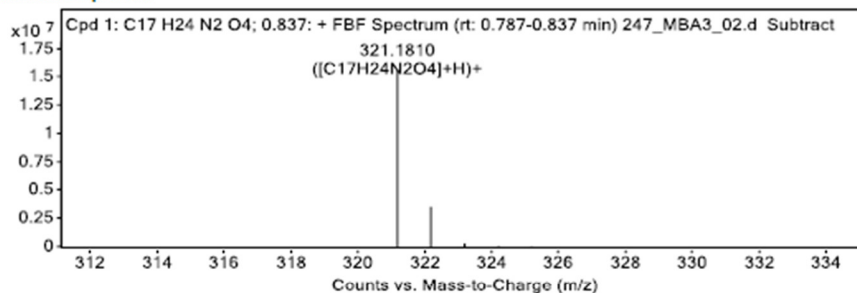

### MS Spectrum Peak List

| m/z      | z | Abund     | Formula    | Ion    |
|----------|---|-----------|------------|--------|
| 321.181  | 1 | 15628177  | C17H24N2O4 | (M+H)+ |
| 322.1839 | 1 | 3490927   | C17H24N2O4 | (M+H)+ |
| 323.1983 | 1 | 242480.19 | C17H24N2O4 | (M+H)+ |
| 324.2019 | 1 | 29219.22  | C17H24N2O4 | (M+H)+ |
| 325.1893 | 1 | 1536.25   | C17H24N2O4 | (M+H)+ |

MS Zoomed Spectrum

## Qualitative Compound Report

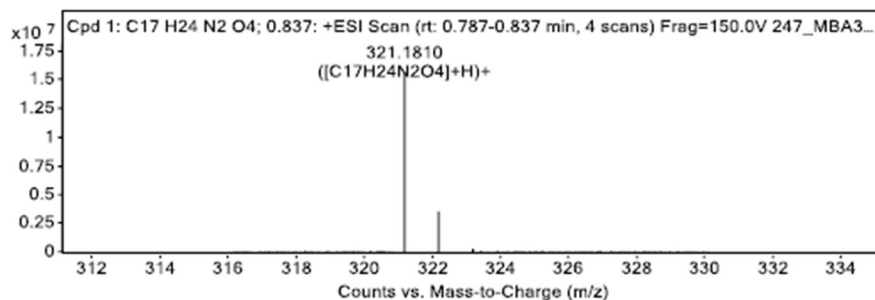

### MS Spectrum Peak List

| m/z      | Calc m/z | Diff(ppm) | z | Abund     | Formula                                                       | Ion                |
|----------|----------|-----------|---|-----------|---------------------------------------------------------------|--------------------|
| 321.181  | 321.1809 | 0.48      | 1 | 15628177  | C <sub>17</sub> H <sub>24</sub> N <sub>2</sub> O <sub>4</sub> | (M+H) <sup>+</sup> |
| 322.1839 | 322.1841 | -0.4      | 1 | 3490927   | C <sub>17</sub> H <sub>24</sub> N <sub>2</sub> O <sub>4</sub> | (M+H) <sup>+</sup> |
| 323.1983 | 323.1866 | 36.36     | 1 | 242480.19 | C <sub>17</sub> H <sub>24</sub> N <sub>2</sub> O <sub>4</sub> | (M+H) <sup>+</sup> |
| 324.2019 | 324.1891 | 39.48     | 1 | 29219.22  | C <sub>17</sub> H <sub>24</sub> N <sub>2</sub> O <sub>4</sub> | (M+H) <sup>+</sup> |
| 325.1893 | 325.1916 | -7.26     | 1 | 1536.25   | C <sub>17</sub> H <sub>24</sub> N <sub>2</sub> O <sub>4</sub> | (M+H) <sup>+</sup> |

--- End Of Report ---

## Compound 2

### $^1\text{H}$ NMR

LP05-4-CD3OD-1H-210227  
LP05-4-CD3OD-1H-210227

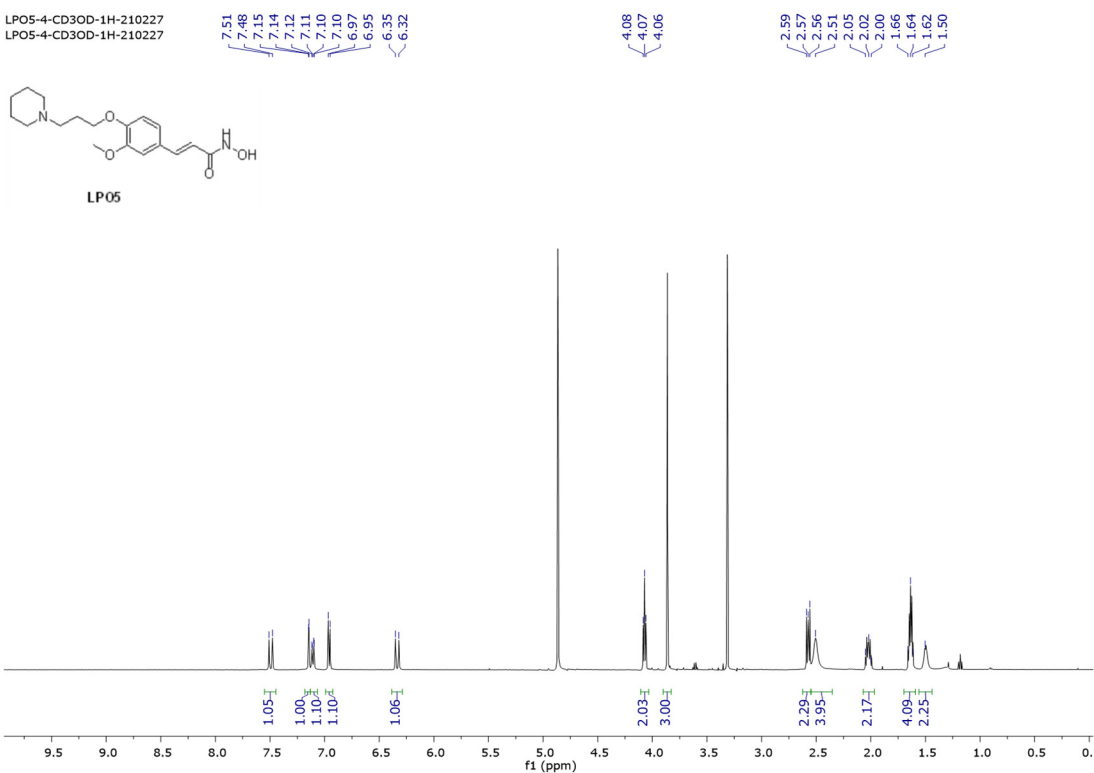

### $^{13}\text{C}$ NMR

LP05-4-CD3OD-13C-210227  
LP05-4-CD3OD-1H-210227

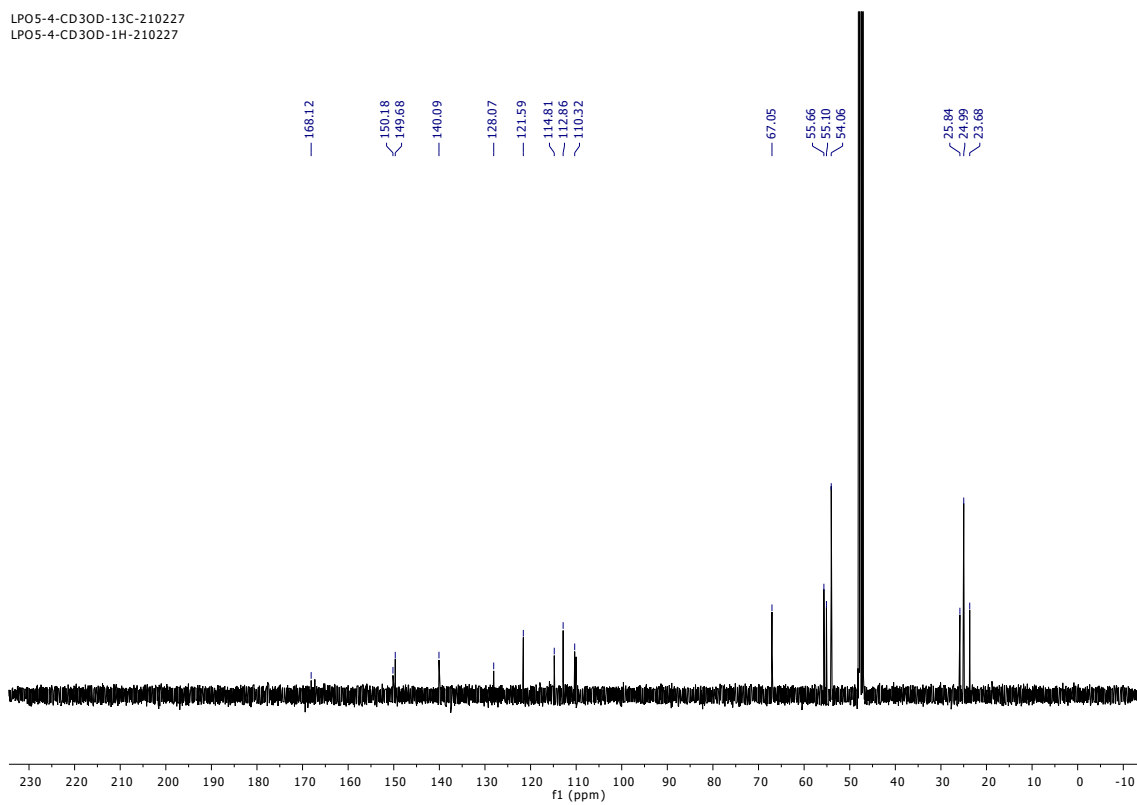

## 2D COSY NMR

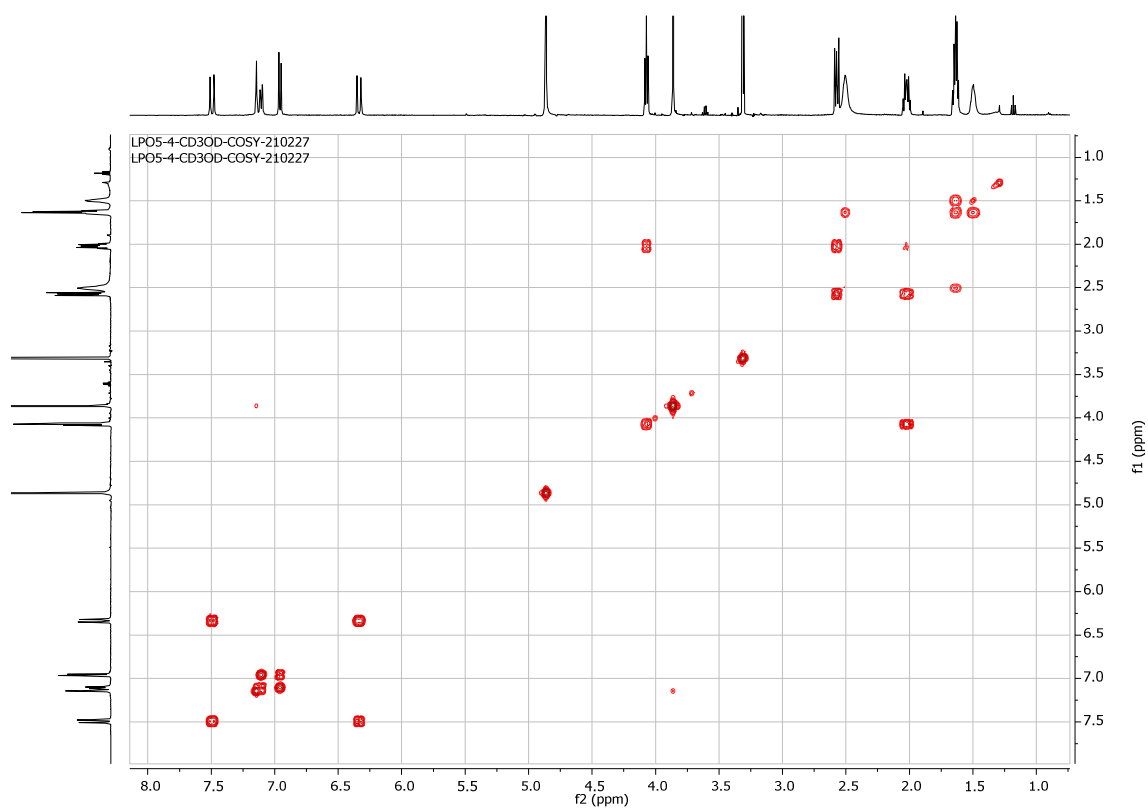

## 2D HSQC NMR

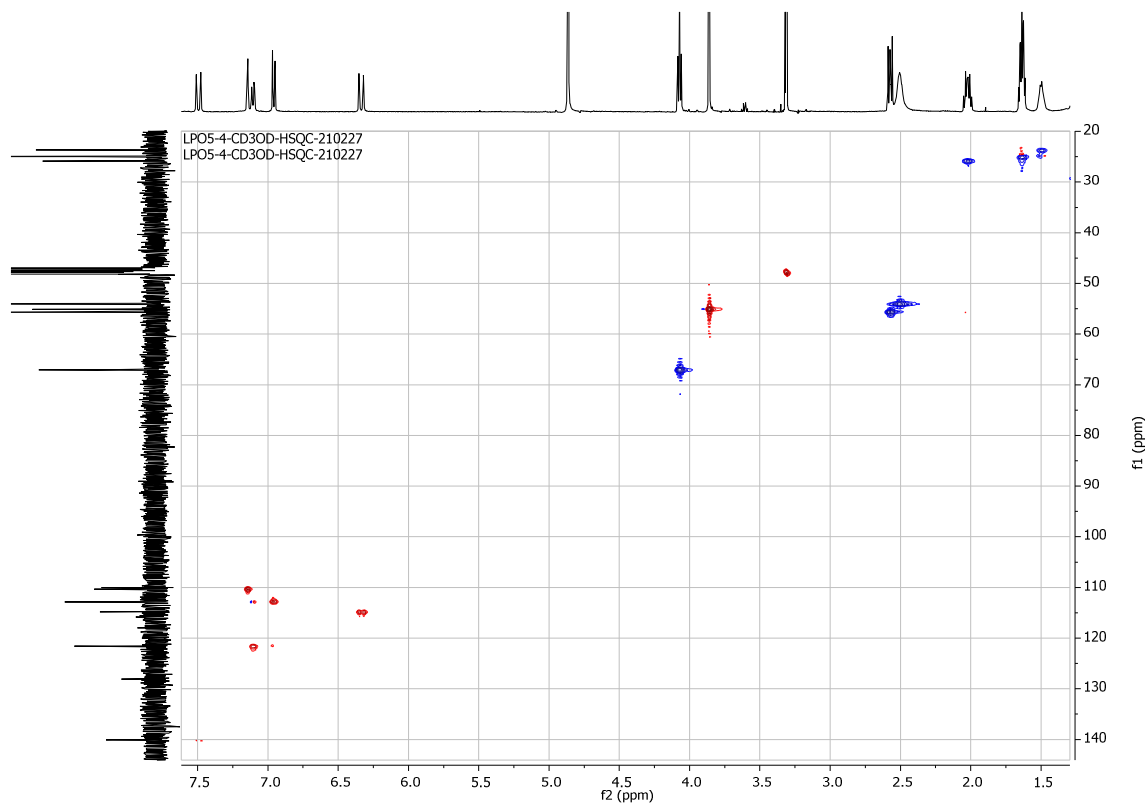

## 2D HMBC NMR

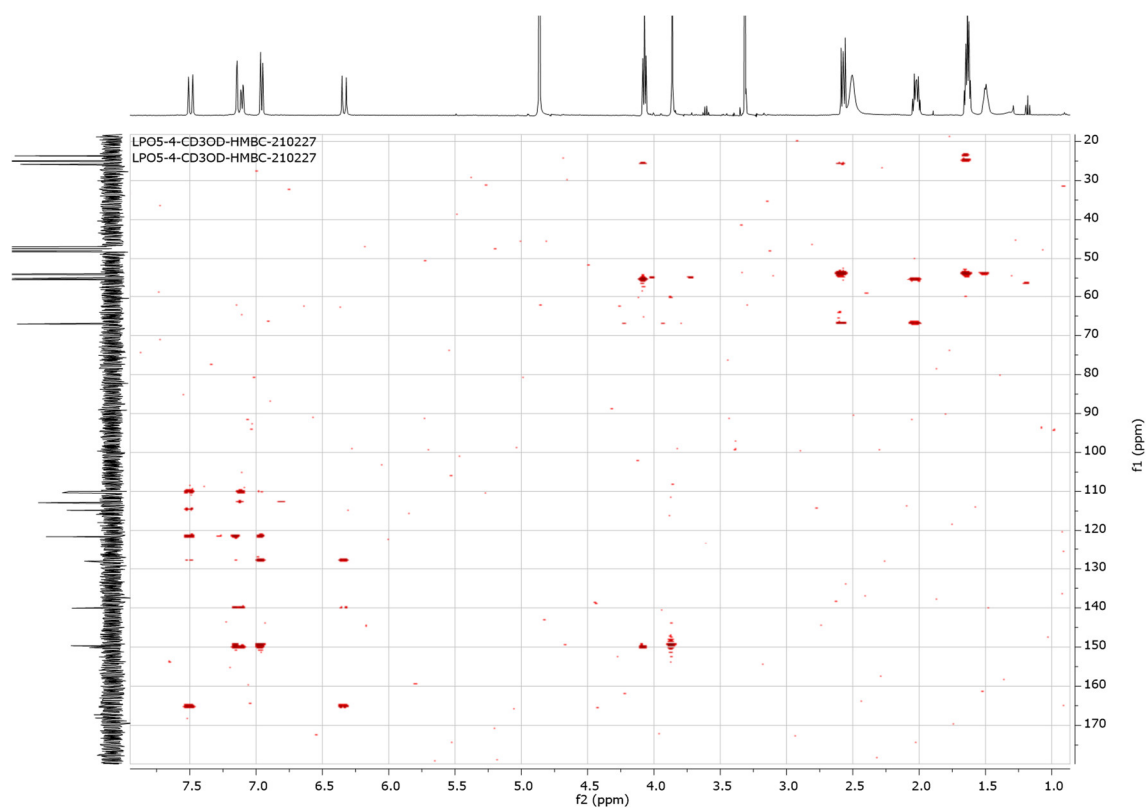

## FTIR

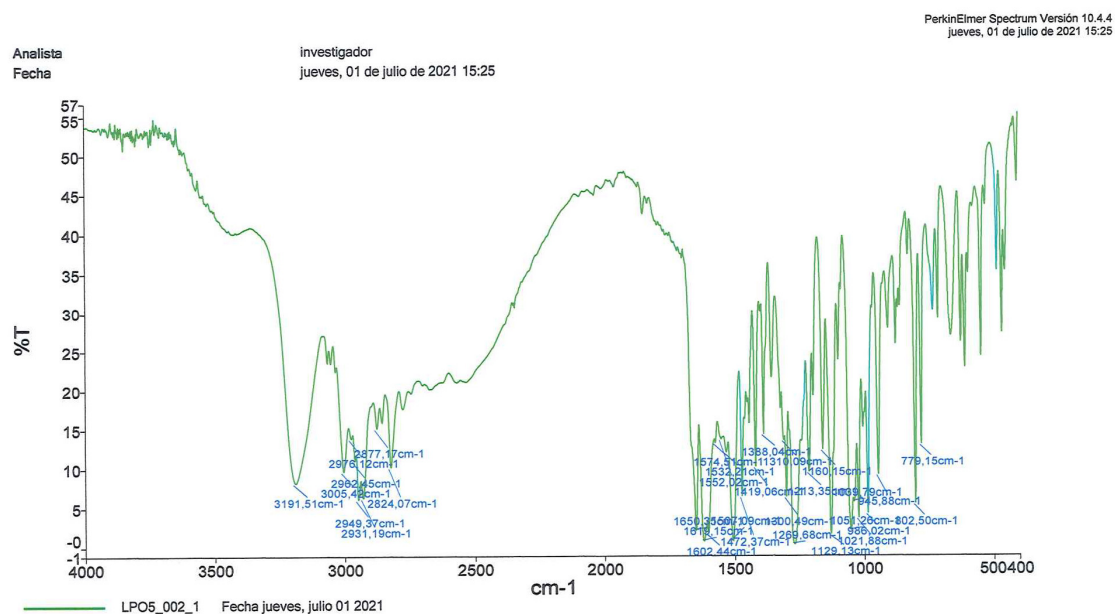

## Qualitative Compound Report

|                        |                      |               |                                   |
|------------------------|----------------------|---------------|-----------------------------------|
| Data File              | 255_LPO5_01.d        | Sample Name   | LPO5                              |
| Sample Type            | Sample               | Position      | Vial 9                            |
| Instrument Name        | Instrument 1         | User Name     |                                   |
| Acq Method             | ESI_ACN_75_pos_new.m | Acquired Time | 2/19/2021 11:57:57 AM (UTC+01:00) |
| IRM Calibration Status | Success              | DA Method     | Defecto_modificado.m              |
| Comment                |                      |               |                                   |

|                          |                                   |                       |                             |
|--------------------------|-----------------------------------|-----------------------|-----------------------------|
| Sample Group             |                                   | Info.                 |                             |
| User                     | DANIEL DIEZ                       | Stream Name           | LC 1                        |
| Acquisition Time (Local) | 2/19/2021 11:57:57 AM (UTC+01:00) | Acquisition SW        | 6200 series TOF/6500 series |
|                          |                                   | Version               | Q-TOF B.08.00 (B8058.3 SP1) |
| QTOF Driver Version      | 8.00.00                           | QTOF Firmware Version | 2.712                       |
| Tune Mass Range          | 1700                              |                       |                             |
| Max.                     |                                   |                       |                             |

### Compound Table

| Compound Label                 | RT    | Mass     | Abund    | Formula       | Tgt Mass | Diff (ppm) | Hits (DB) |
|--------------------------------|-------|----------|----------|---------------|----------|------------|-----------|
| Cpd 1: C18 H26 N2 O4;<br>2.698 | 2.698 | 334.1909 | 13238040 | C18 H26 N2 O4 | 334.1893 | 4.92       | 1         |

| Compound Label                 | m/z      | RT    | Algorithm       | Mass     |
|--------------------------------|----------|-------|-----------------|----------|
| Cpd 1: C18 H26 N2 O4;<br>2.698 | 335.1977 | 2.698 | Find by Formula | 334.1909 |

### MS Zoomed Spectrum

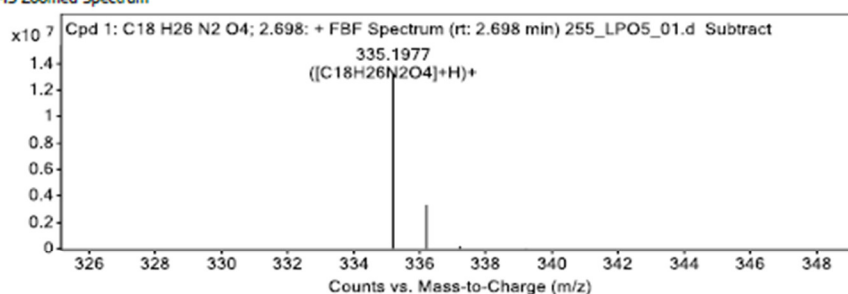

### MS Spectrum Peak List

| m/z      | z | Abund     | Formula    | Ion    |
|----------|---|-----------|------------|--------|
| 335.1977 | 1 | 13238040  | C18H26N2O4 | (M+H)+ |
| 336.2028 | 1 | 3285623.5 | C18H26N2O4 | (M+H)+ |
| 337.2164 | 1 | 180252.14 | C18H26N2O4 | (M+H)+ |
| 339.2135 | 1 | 4773.48   | C18H26N2O4 | (M+H)+ |

### MS Zoomed Spectrum

## Qualitative Compound Report

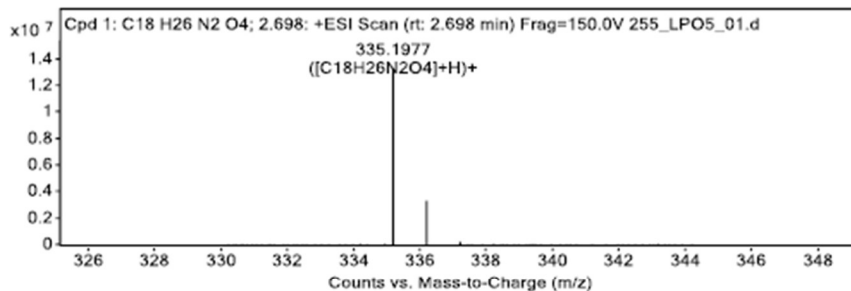

### MS Spectrum Peak List

| m/z      | Calc m/z | Diff(ppm) | z | Abund     | Formula                                                       | Ion                |
|----------|----------|-----------|---|-----------|---------------------------------------------------------------|--------------------|
| 335.1977 | 335.1965 | 3.34      | 1 | 13238040  | C <sub>18</sub> H <sub>26</sub> N <sub>2</sub> O <sub>4</sub> | (M+H) <sup>+</sup> |
| 336.2028 | 336.1997 | 9.13      | 1 | 3285623.5 | C <sub>18</sub> H <sub>26</sub> N <sub>2</sub> O <sub>4</sub> | (M+H) <sup>+</sup> |
| 337.2164 | 337.2023 | 41.73     | 1 | 180252.14 | C <sub>18</sub> H <sub>26</sub> N <sub>2</sub> O <sub>4</sub> | (M+H) <sup>+</sup> |
| 339.2135 | 339.2074 | 17.91     | 1 | 4773.48   | C <sub>18</sub> H <sub>26</sub> N <sub>2</sub> O <sub>4</sub> | (M+H) <sup>+</sup> |

--- End Of Report ---

## Compound 3

### <sup>1</sup>H NMR

LPO1-CD3OD-1H-201122  
LPO1-CD3OD-1H-201122

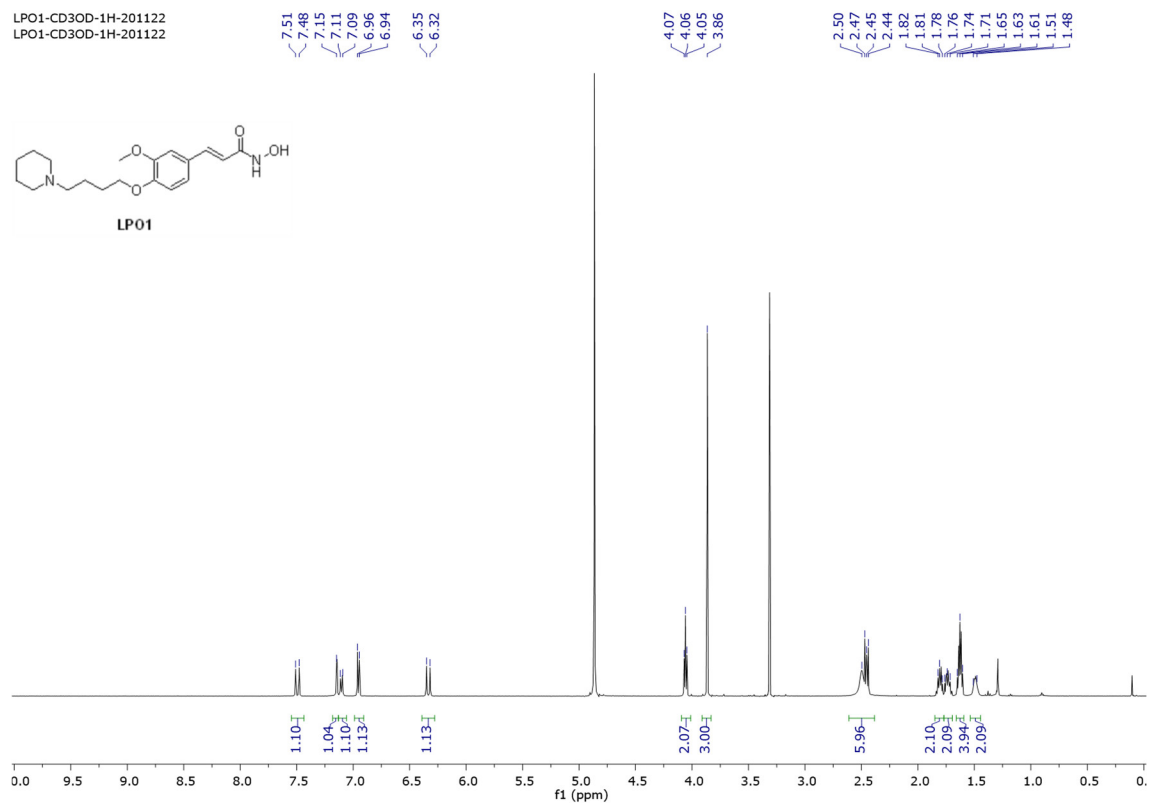

### <sup>13</sup>C NMR

LPO1-CD3OD-13c-201122  
LPO1-CD3OD-1H-201122

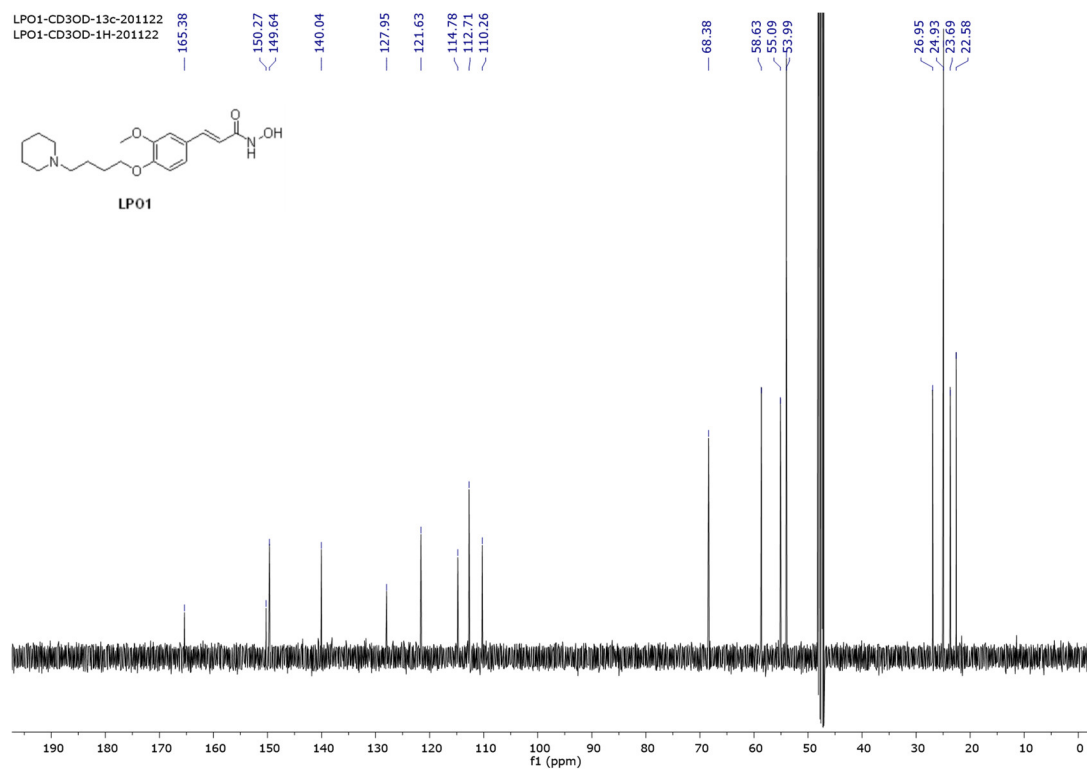



## 2D COSY NMR

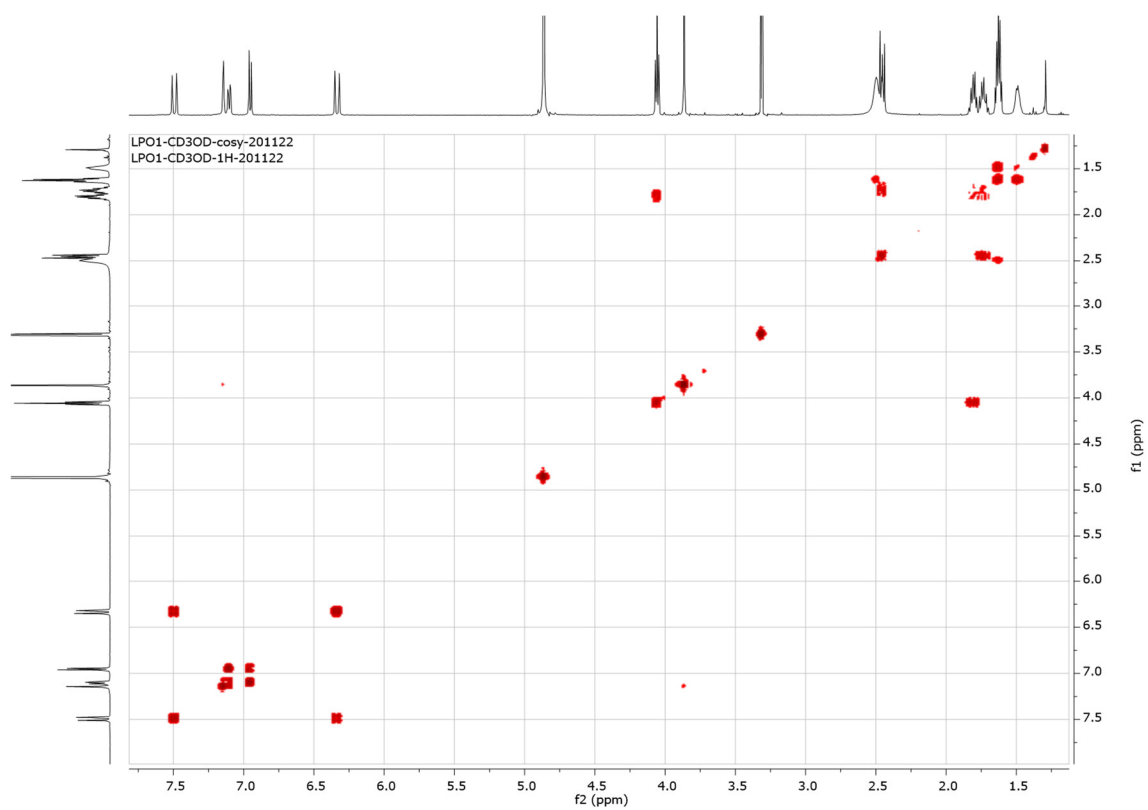

## 2D HSQC NMR

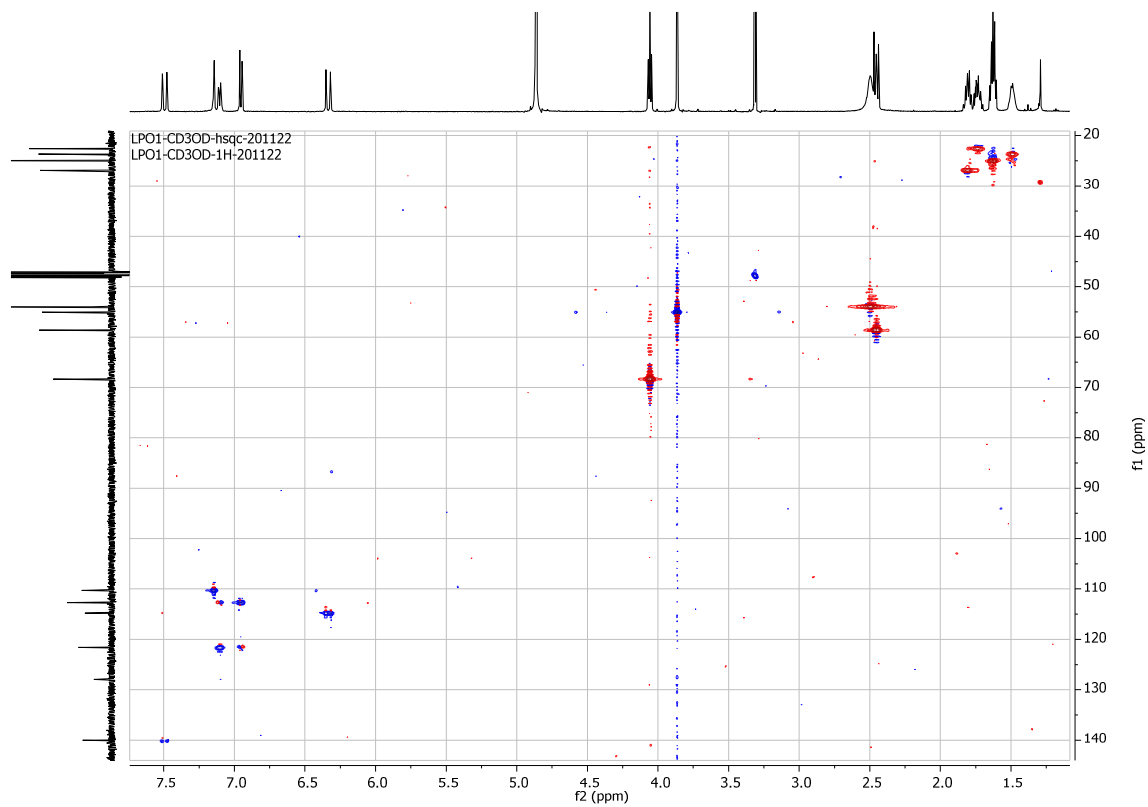

## 2D HMBC NMR

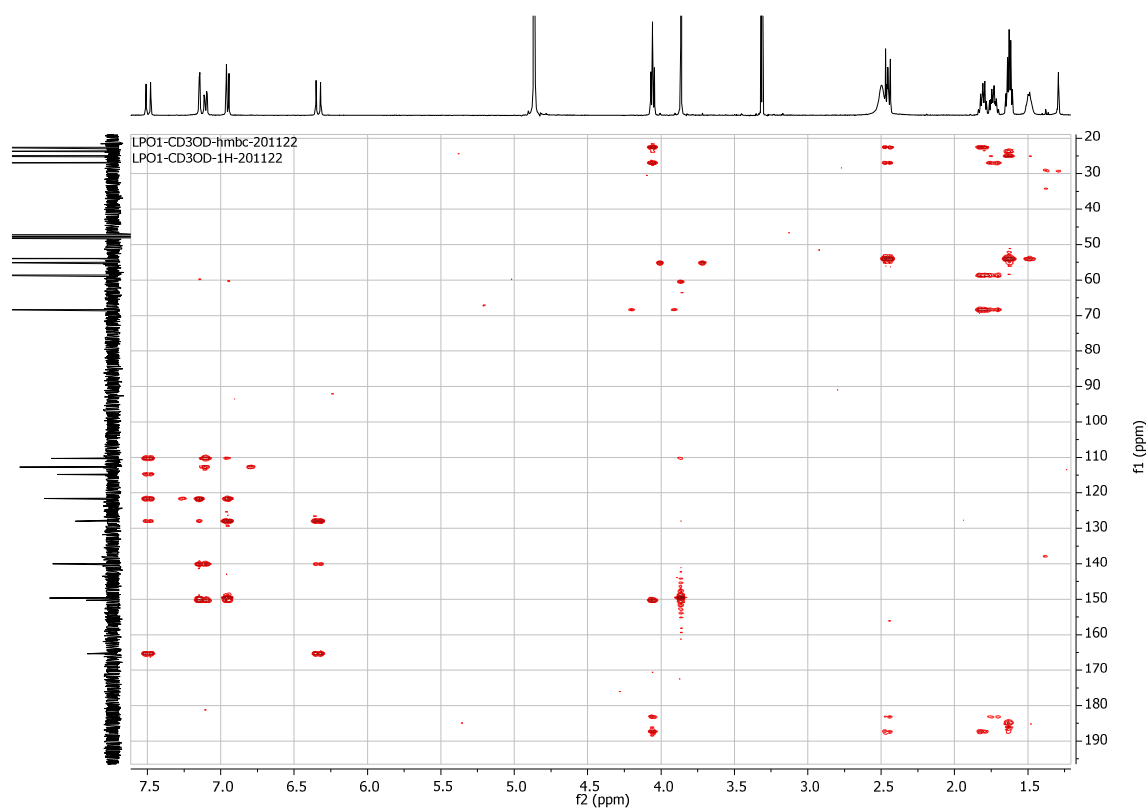

## FTIR

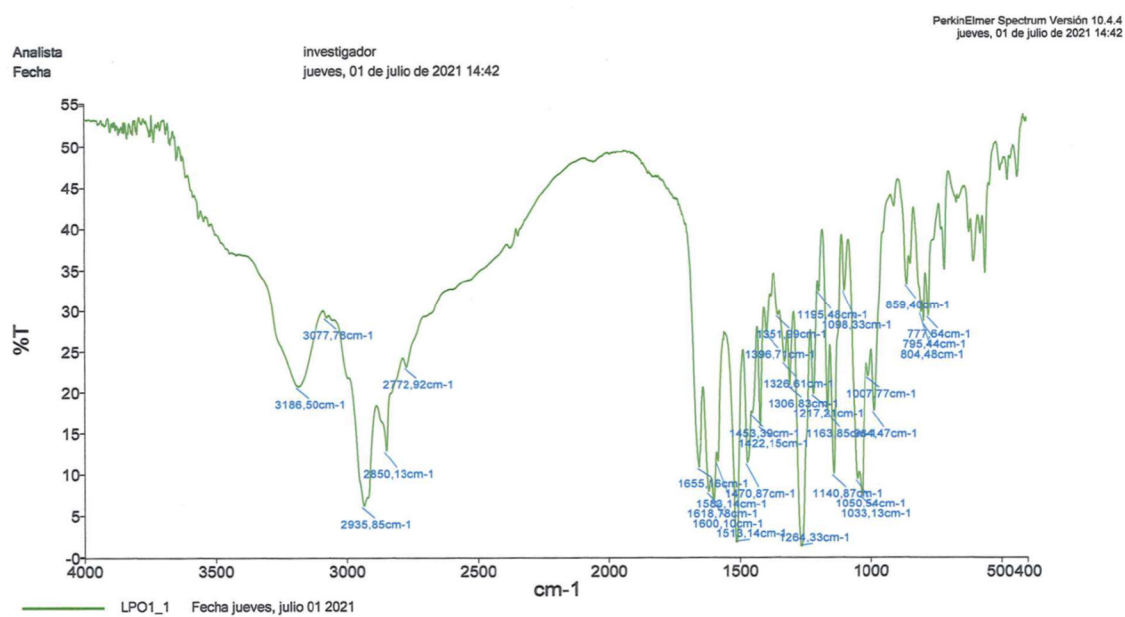

HRMS

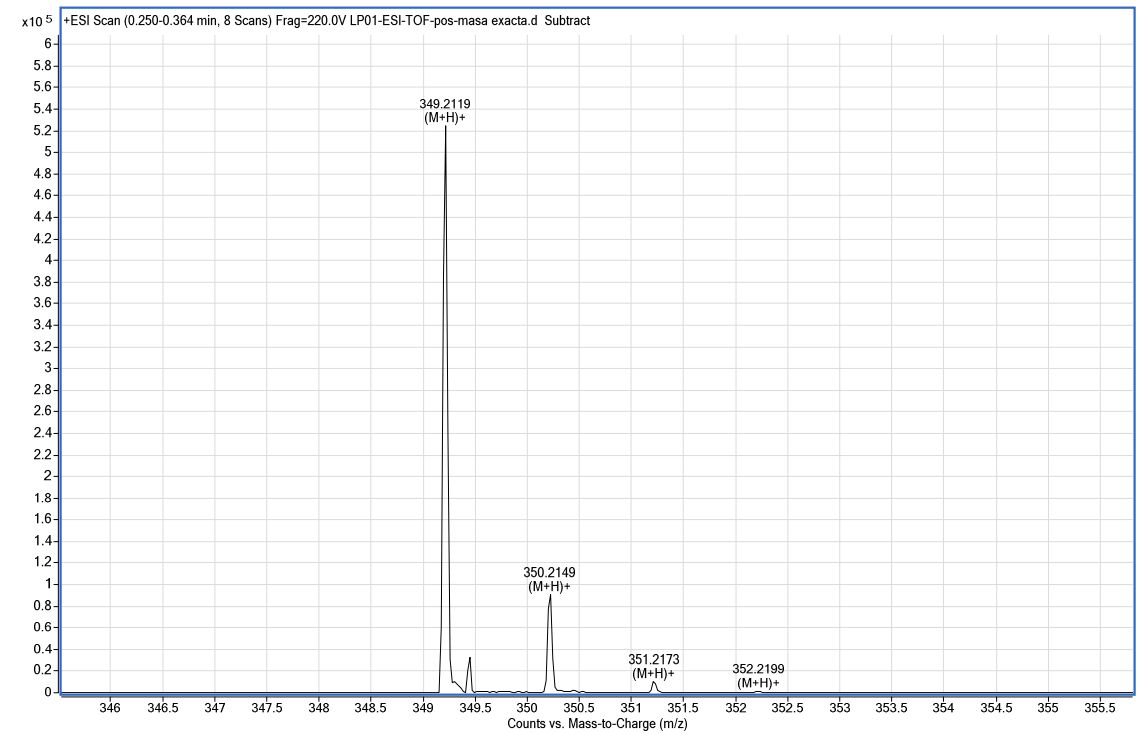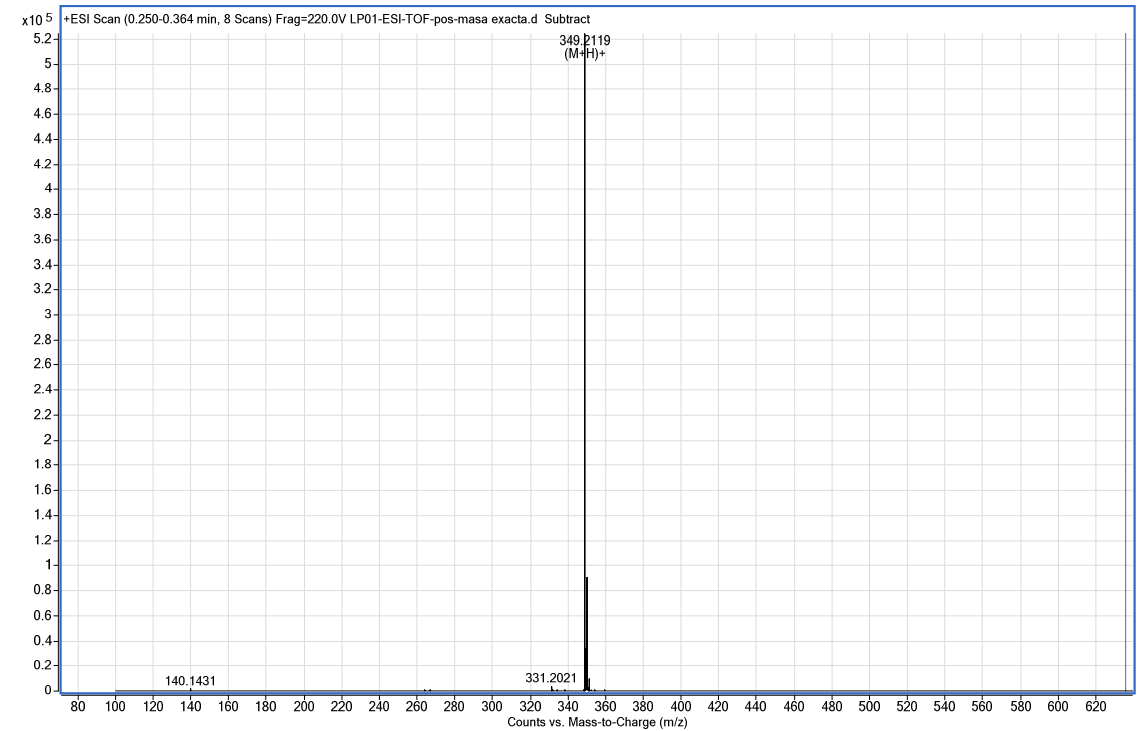

| Best    | Name        | Formula       | Score      | Mass        | Mass (Tgt)      | Mass (DB)          | Mass (MFG)        | Diff (ppm)         | Diff (abs. ppm)           | Diff (mDa)         |
|---------|-------------|---------------|------------|-------------|-----------------|--------------------|-------------------|--------------------|---------------------------|--------------------|
|         |             | C19 H28 N2 O4 | 96.17      | 348.2046    |                 |                    | 348.2049          | 0.86               | 0.86                      | 0.3                |
| Species |             |               |            |             |                 |                    |                   |                    |                           |                    |
|         | Ion Formula | m/z           | Height     | Score (MFG) | Score (MFG, MS) | Score (MFG, MS/MS) | Score (MFG, mass) | Score (MFG, abund) | Score (MFG, iso. spacing) |                    |
|         | (M+H)+      | C19 H29 N2 O4 | 349.2122   | 524306.3    | 96.17           | 96.17              | 99.43             | 87.64              | 99.87                     |                    |
|         | m/z         | m/z (Calc)    | Diff (ppm) | Diff (mDa)  | Height          | Height (Calc)      | Height %          | Height % (Calc)    | Height Sum %              | Height Sum% (Calc) |
|         | 349.2119    | 349.2122      | 0.86       | 0.3         | 530318.7        | 508024.2           | 100               | 100                | 83.4                      | 79.9               |
|         | 350.2149    | 350.2154      | 1.27       | 0.4         | 94060.8         | 110578.8           | 17.7              | 21.8               | 14.8                      | 17.4               |
|         | 351.2173    | 351.218       | 2.03       | 0.7         | 10364.4         | 15638.9            | 2                 | 3.1                | 1.6                       | 2.5                |
|         | 352.2199    | 352.2206      | 1.91       | 0.7         | 1158.3          | 1660.2             | 0.2               | 0.3                | 0.2                       | 0.3                |

# Compound 4

## <sup>1</sup>H NMR

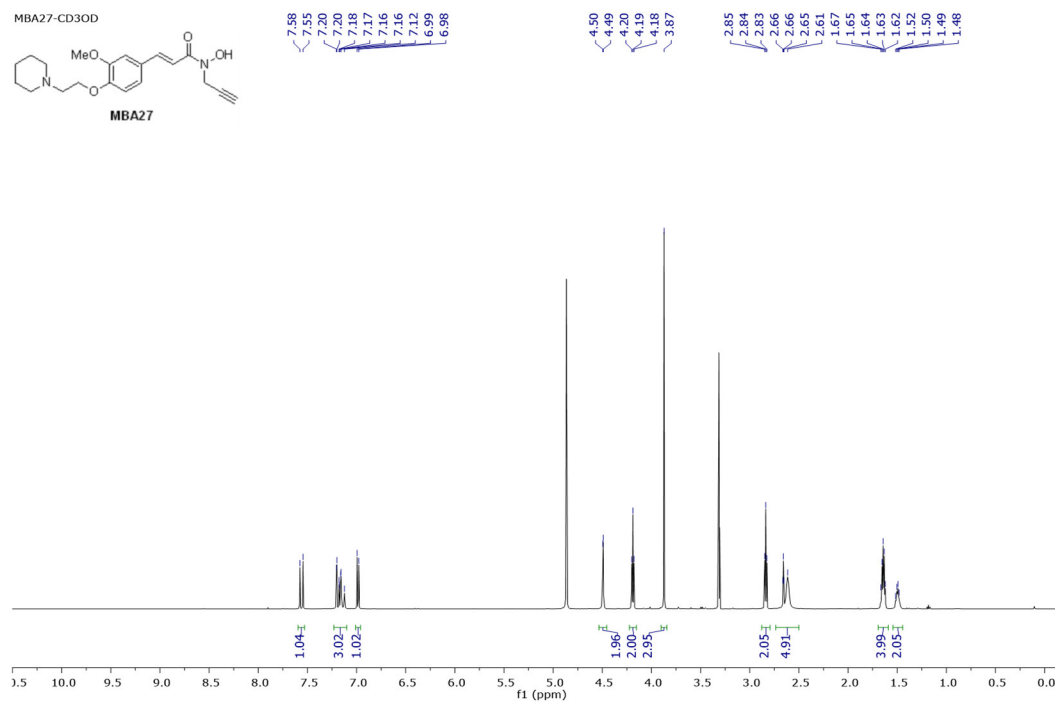

## <sup>13</sup>C NMR

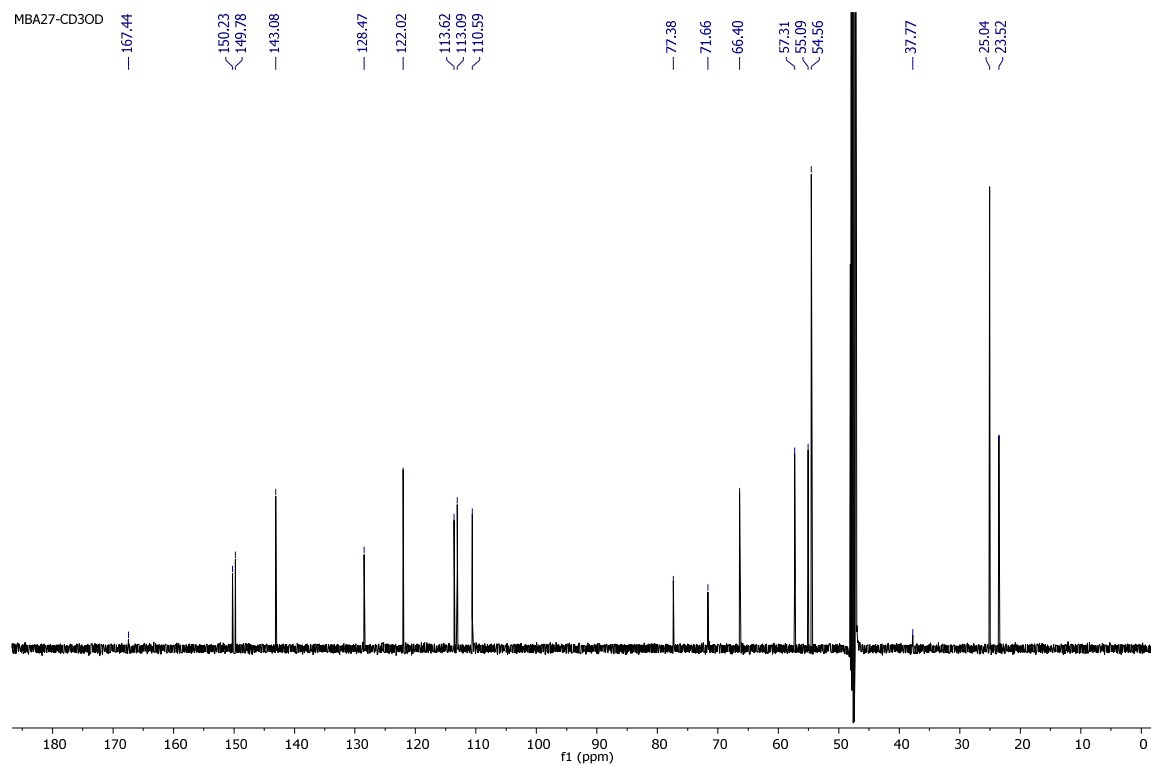

## 2D COSY NMR

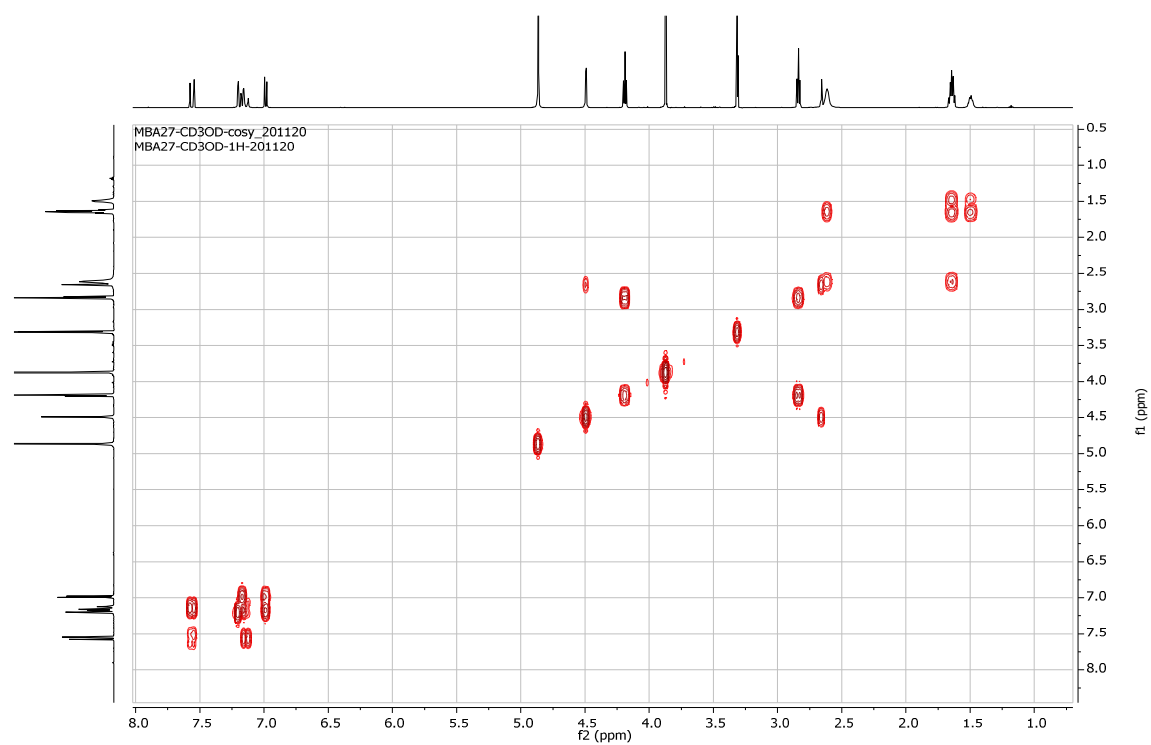

## 2D HSQC NMR

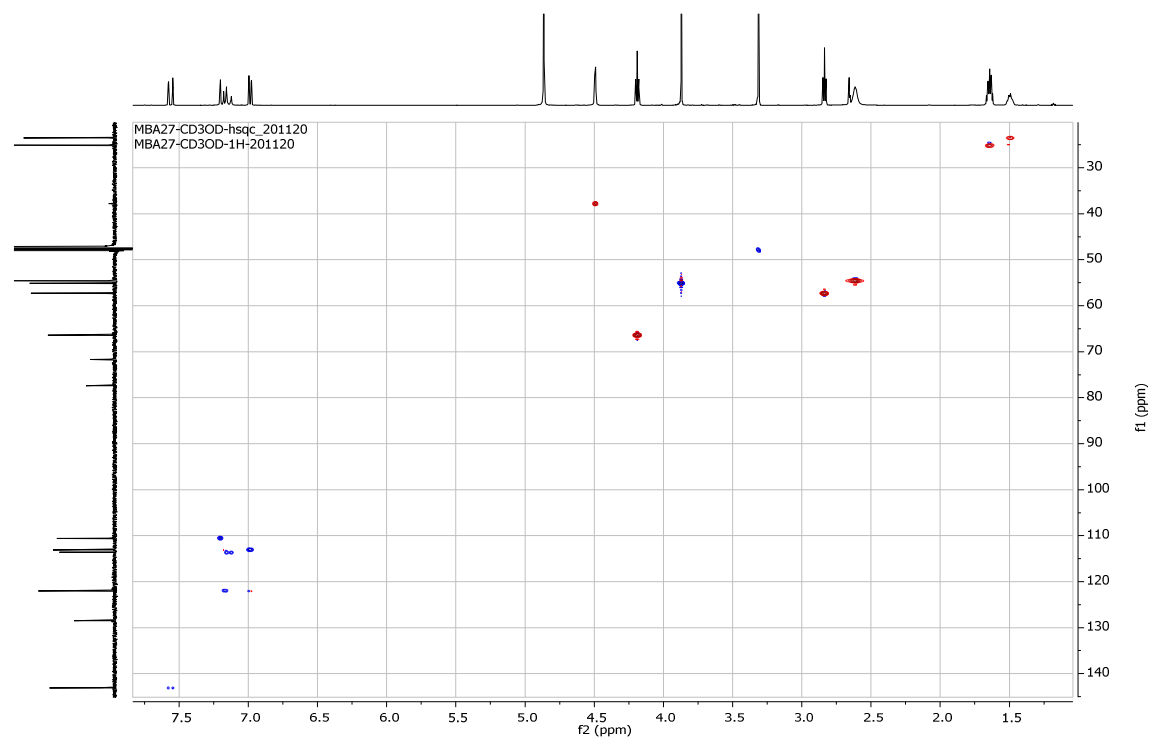

## 2D HMBC NMR

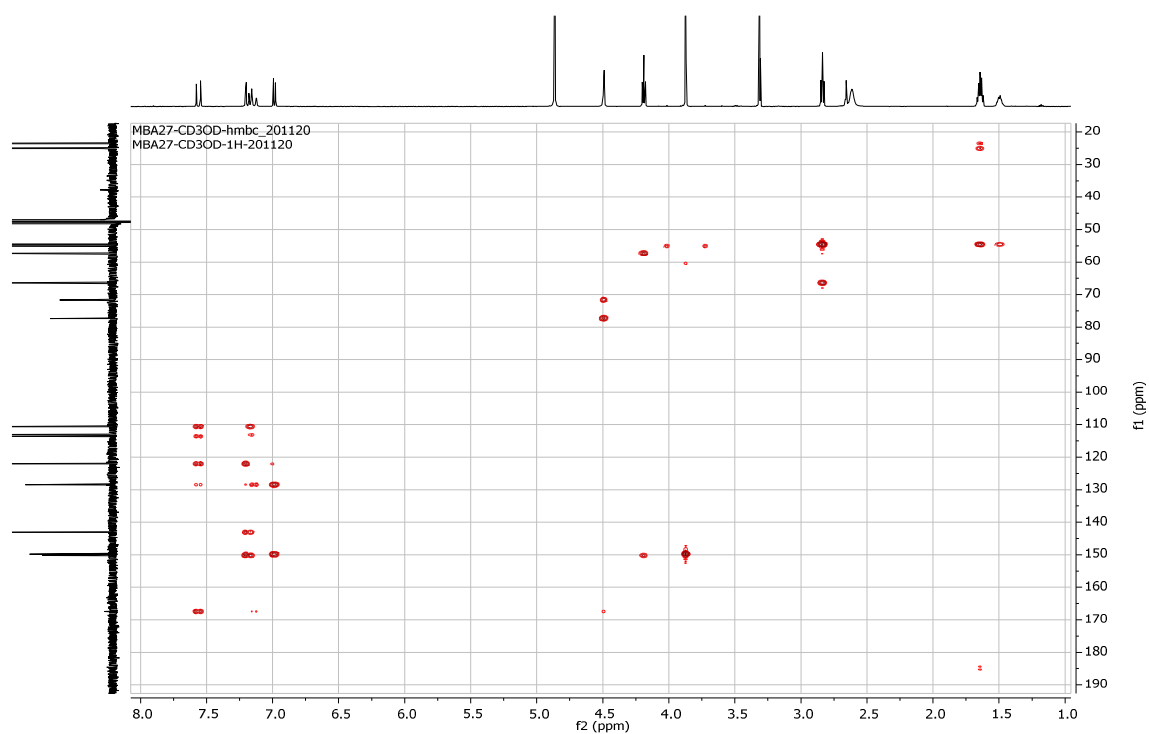

## FTIR

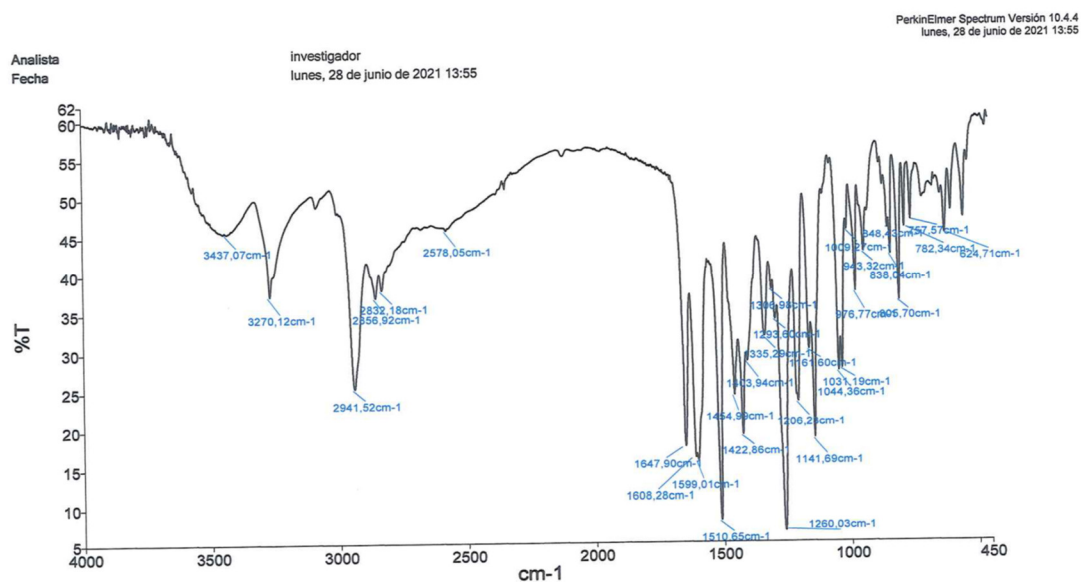

## Qualitative Compound Report

|                        |                      |               |                                   |
|------------------------|----------------------|---------------|-----------------------------------|
| Data File              | 248_MBA27_01.d       | Sample Name   | MBA27                             |
| Sample Type            | Sample               | Position      | Vial 2                            |
| Instrument Name        | Instrument 1         | User Name     |                                   |
| Acq Method             | ESI_ACN_75_pos_new.m | Acquired Time | 2/19/2021 11:07:10 AM (UTC+01:00) |
| IRM Calibration Status | Success              | DA Method     | Defecto_modificado.m              |
| Comment                |                      |               |                                   |

|                          |                                   |                        |                                                         |
|--------------------------|-----------------------------------|------------------------|---------------------------------------------------------|
| Sample Group             |                                   | Info.                  |                                                         |
| User                     | DANIEL DIEZ                       | Stream Name            | LC 1                                                    |
| Acquisition Time (Local) | 2/19/2021 11:07:10 AM (UTC+01:00) | Acquisition SW Version | 6200 series TOF/6500 series Q-TOF B.08.00 (B8058.3 SP1) |
| QTOF Driver Version      | 8.00.00                           | QTOF Firmware Version  | 2.712                                                   |
| Tune Mass Range          | 1700                              |                        |                                                         |
| Max.                     |                                   |                        |                                                         |

### Compound Table

| Compound Label              | RT    | Mass     | Abund    | Formula       | Tgt Mass | Diff (ppm) | Hits (DB) |
|-----------------------------|-------|----------|----------|---------------|----------|------------|-----------|
| Cpd 1: C20 H26 N2 O4; 0.418 | 0.418 | 358.1905 | 10284418 | C20 H26 N2 O4 | 358.1893 | 3.38       | 1         |

| Compound Label              | m/z      | RT    | Algorithm       | Mass     |
|-----------------------------|----------|-------|-----------------|----------|
| Cpd 1: C20 H26 N2 O4; 0.418 | 359.1975 | 0.418 | Find by Formula | 358.1905 |

### MS Zoomed Spectrum

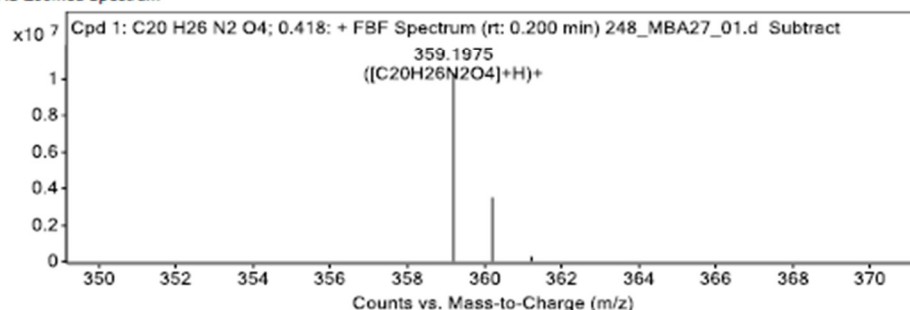

### MS Spectrum Peak List

| m/z      | z | Abund      | Formula    | Ion    |
|----------|---|------------|------------|--------|
| 359.1975 | 1 | 10284418   | C20H26N2O4 | (M+H)+ |
| 360.2004 | 1 | 3511802.75 | C20H26N2O4 | (M+H)+ |
| 361.2185 | 1 | 278680.59  | C20H26N2O4 | (M+H)+ |

### MS Zoomed Spectrum

## Qualitative Compound Report

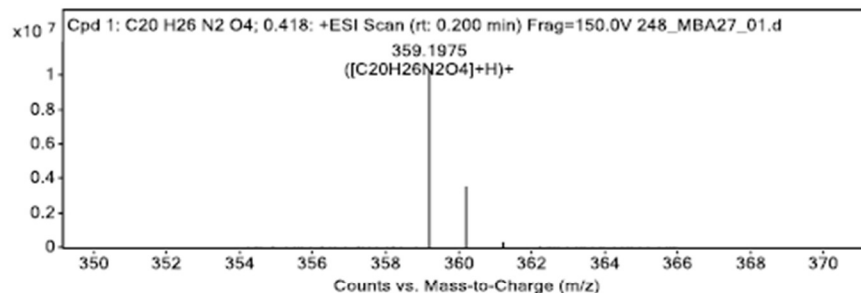

**MS Spectrum Peak List**

| m/z      | Calc m/z | Diff(ppm) | z | Abund      | Formula                                                       | Ion                |
|----------|----------|-----------|---|------------|---------------------------------------------------------------|--------------------|
| 359.1975 | 359.1965 | 2.73      | 1 | 10284418   | C <sub>20</sub> H <sub>26</sub> N <sub>2</sub> O <sub>4</sub> | (M+H) <sup>+</sup> |
| 360.2004 | 360.1997 | 1.97      | 1 | 3511802.75 | C <sub>20</sub> H <sub>26</sub> N <sub>2</sub> O <sub>4</sub> | (M+H) <sup>+</sup> |
| 361.2185 | 361.2024 | 44.47     | 1 | 278680.59  | C <sub>20</sub> H <sub>26</sub> N <sub>2</sub> O <sub>4</sub> | (M+H) <sup>+</sup> |

--- End Of Report ---



# Compound 5

## <sup>1</sup>H NMR

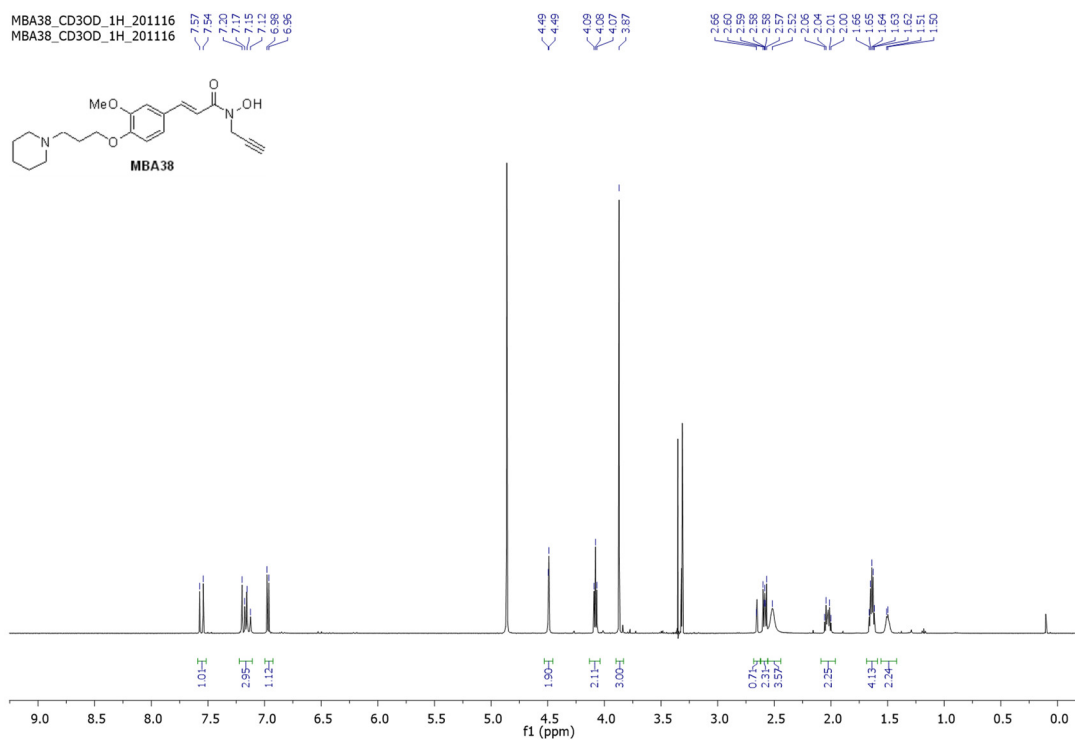

## <sup>13</sup>C NMR

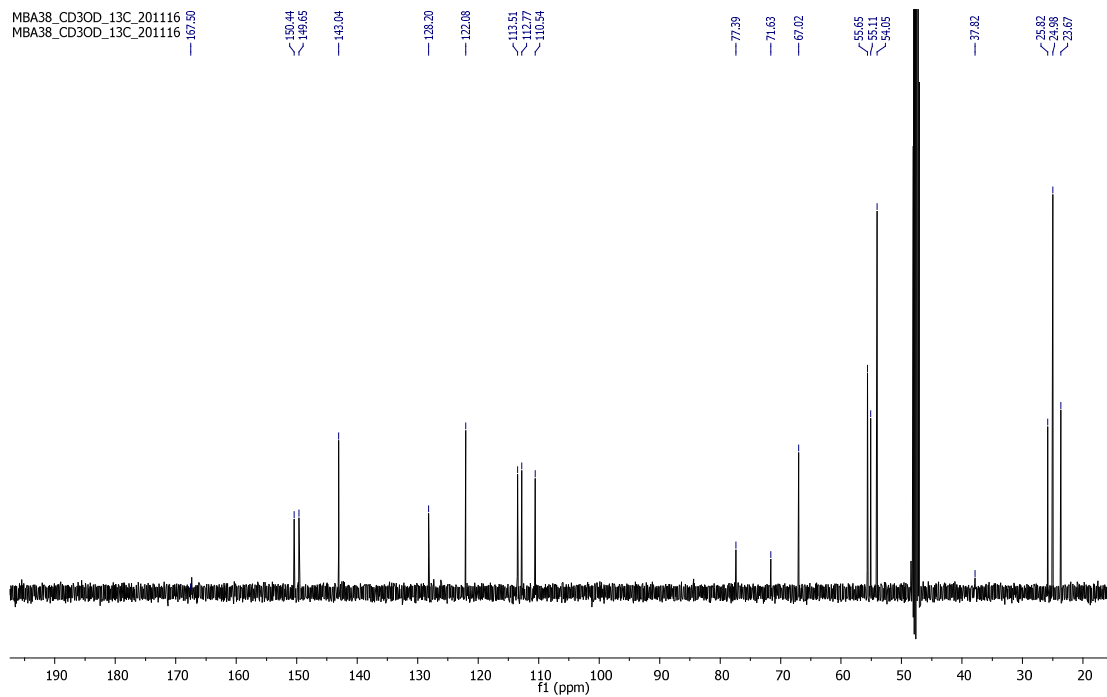

## 2D COSY NMR

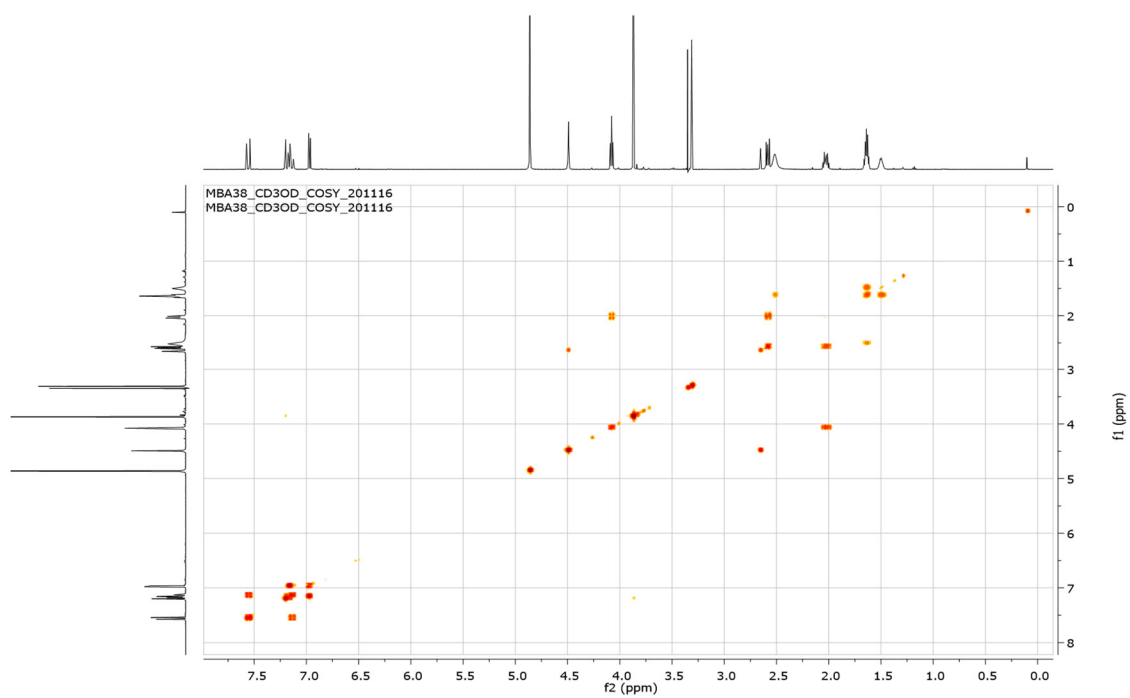

## 2D HSQC NMR

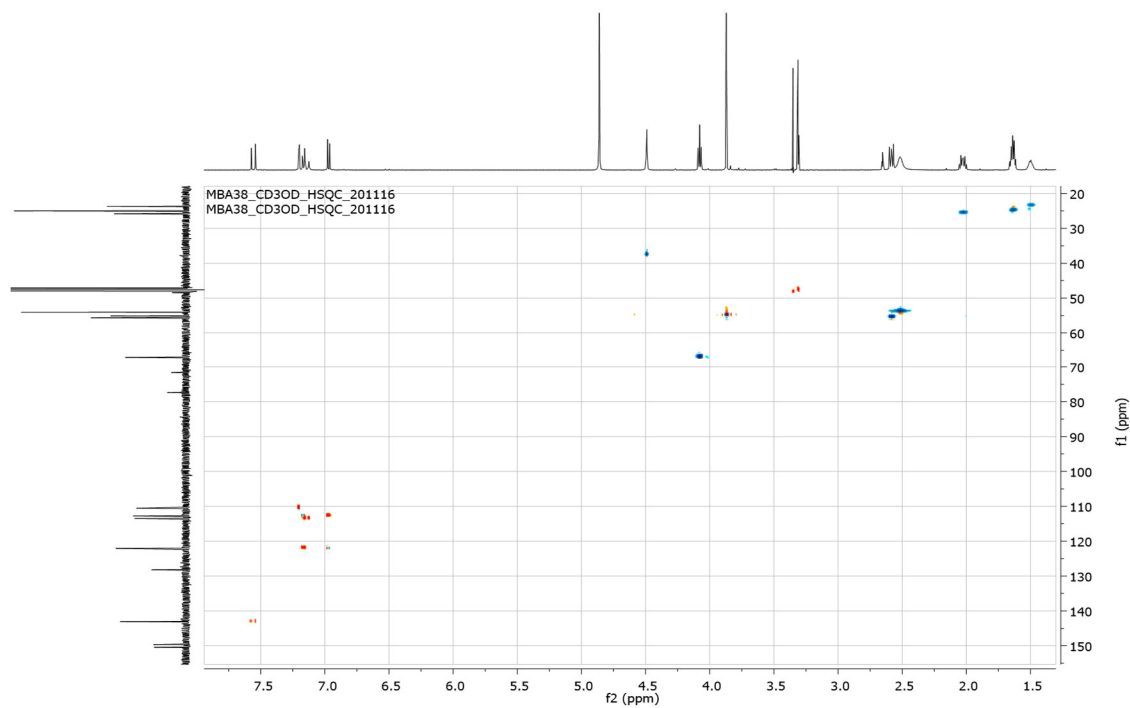

## 2D HMBC NMR

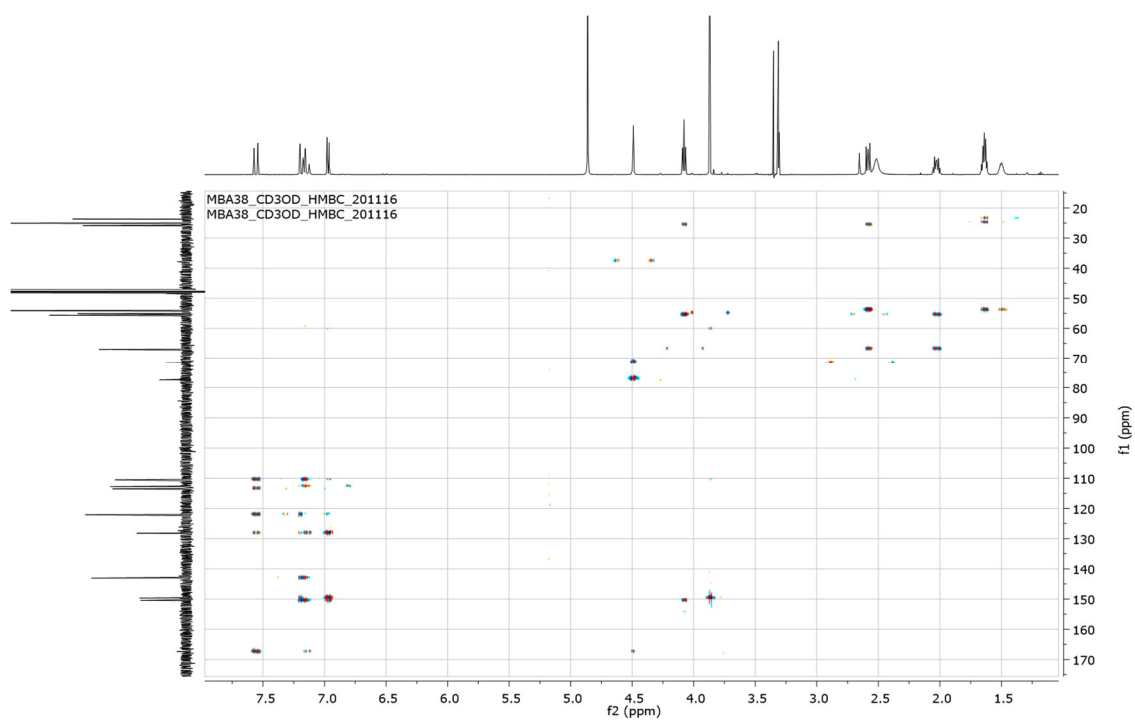

## FTIR

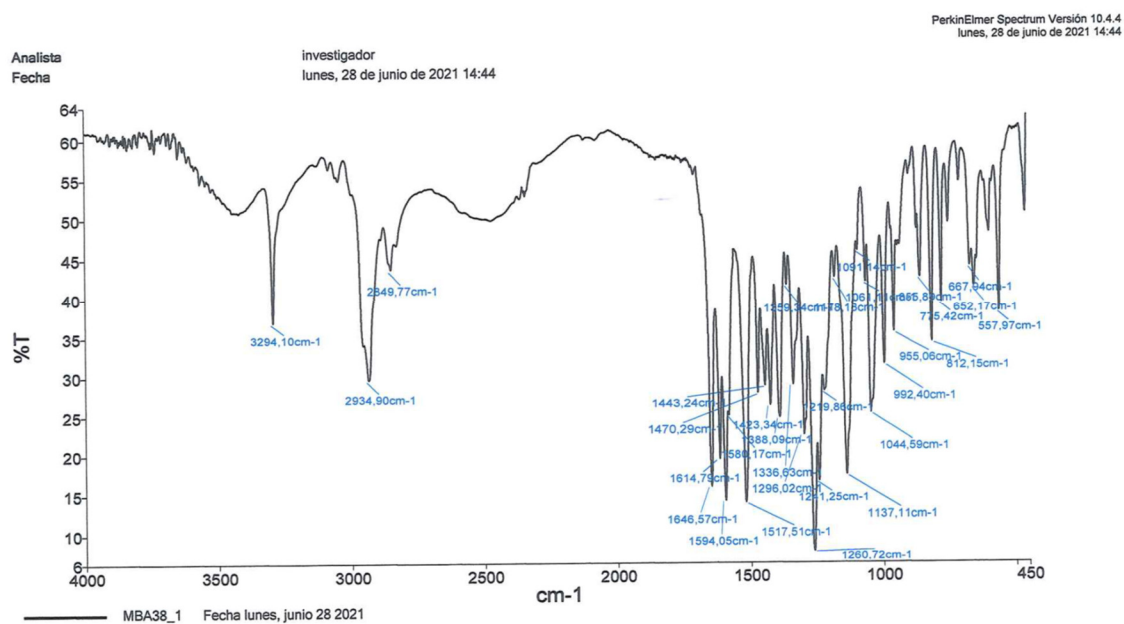

## Qualitative Compound Report

|                        |                      |               |                                   |
|------------------------|----------------------|---------------|-----------------------------------|
| Data File              | 249_MBA38_01.d       | Sample Name   | MBA38                             |
| Sample Type            | Sample               | Position      | Vial 3                            |
| Instrument Name        | Instrument 1         | User Name     |                                   |
| Acq Method             | ESI_ACN_75_pos_new.m | Acquired Time | 2/19/2021 11:14:26 AM (UTC+01:00) |
| IRM Calibration Status | Success              | DA Method     | Defecto_modificado.m              |
| Comment                |                      |               |                                   |

|                          |                                   |                        |                                                         |
|--------------------------|-----------------------------------|------------------------|---------------------------------------------------------|
| Sample Group             |                                   | Info.                  |                                                         |
| User                     | DANIEL DIEZ                       | Stream Name            | LC 1                                                    |
| Acquisition Time (Local) | 2/19/2021 11:14:26 AM (UTC+01:00) | Acquisition SW Version | 6200 series TOF/6500 series Q-TOF B.08.00 (B8058.3 SP1) |
| QTOF Driver Version      | 8.00.00                           | QTOF Firmware Version  | 2.712                                                   |
| Tune Mass Range          | 1700                              |                        |                                                         |
| Max.                     |                                   |                        |                                                         |

Compound Table

| Compound Label              | RT    | Mass     | Abund   | Formula       | Tgt Mass | Diff (ppm) | Hits (DB) |
|-----------------------------|-------|----------|---------|---------------|----------|------------|-----------|
| Cpd 1: C21 H28 N2 O4; 0.257 | 0.257 | 372.2035 | 1431751 | C21 H28 N2 O4 | 372.2049 | -3.66      | 1         |

| Compound Label              | m/z      | RT    | Algorithm       | Mass     |
|-----------------------------|----------|-------|-----------------|----------|
| Cpd 1: C21 H28 N2 O4; 0.257 | 373.2093 | 0.257 | Find by Formula | 372.2035 |

MS Zoomed Spectrum

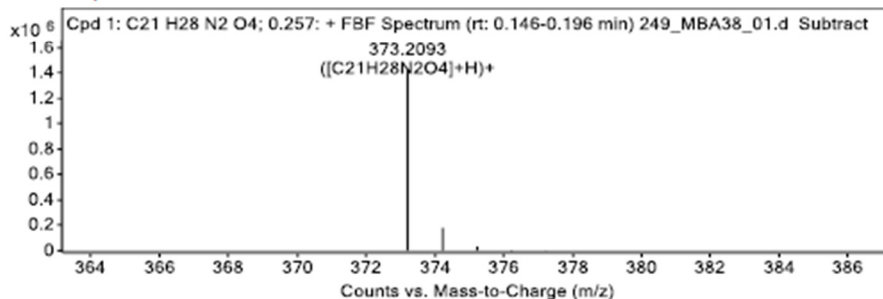

MS Spectrum Peak List

| m/z      | z | Abund      | Formula    | Ion    |
|----------|---|------------|------------|--------|
| 373.2093 | 1 | 1431750.88 | C21H28N2O4 | (M+H)+ |
| 374.2238 | 1 | 181837.64  | C21H28N2O4 | (M+H)+ |
| 375.2262 | 1 | 32809.93   | C21H28N2O4 | (M+H)+ |
| 376.2323 | 1 | 4496.41    | C21H28N2O4 | (M+H)+ |
| 377.2283 | 1 | 738.6      | C21H28N2O4 | (M+H)+ |

MS Zoomed Spectrum

## Qualitative Compound Report

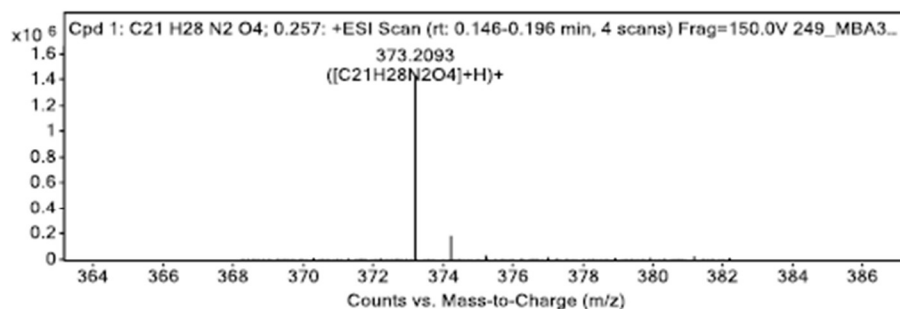

### MS Spectrum Peak List

| m/z      | Calc m/z | Diff(ppm) | z | Abund      | Formula                                                       | Ion                |
|----------|----------|-----------|---|------------|---------------------------------------------------------------|--------------------|
| 373.2093 | 373.2122 | -7.68     | 1 | 1431750.88 | C <sub>21</sub> H <sub>28</sub> N <sub>2</sub> O <sub>4</sub> | (M+H) <sup>+</sup> |
| 374.2238 | 374.2154 | 22.55     | 1 | 181837.64  | C <sub>21</sub> H <sub>28</sub> N <sub>2</sub> O <sub>4</sub> | (M+H) <sup>+</sup> |
| 375.2262 | 375.2181 | 21.56     | 1 | 32809.93   | C <sub>21</sub> H <sub>28</sub> N <sub>2</sub> O <sub>4</sub> | (M+H) <sup>+</sup> |
| 376.2323 | 376.2207 | 30.71     | 1 | 4496.41    | C <sub>21</sub> H <sub>28</sub> N <sub>2</sub> O <sub>4</sub> | (M+H) <sup>+</sup> |
| 377.2283 | 377.2233 | 13.24     | 1 | 738.6      | C <sub>21</sub> H <sub>28</sub> N <sub>2</sub> O <sub>4</sub> | (M+H) <sup>+</sup> |

--- End Of Report ---

# Compound 6

## <sup>1</sup>H NMR

Jun03-2021-OBA-MBA62-210603  
MBA62-1H-210603

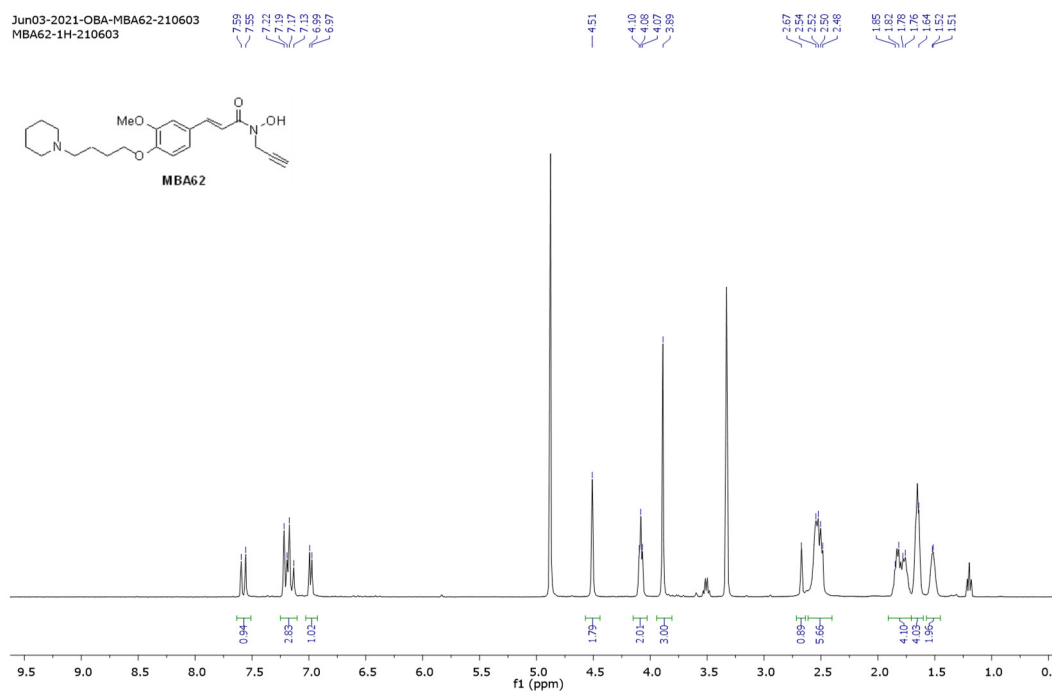

## <sup>13</sup>C NMR

Jun03-2021-OBA-MBA62-210603  
MBA62-13C-210603

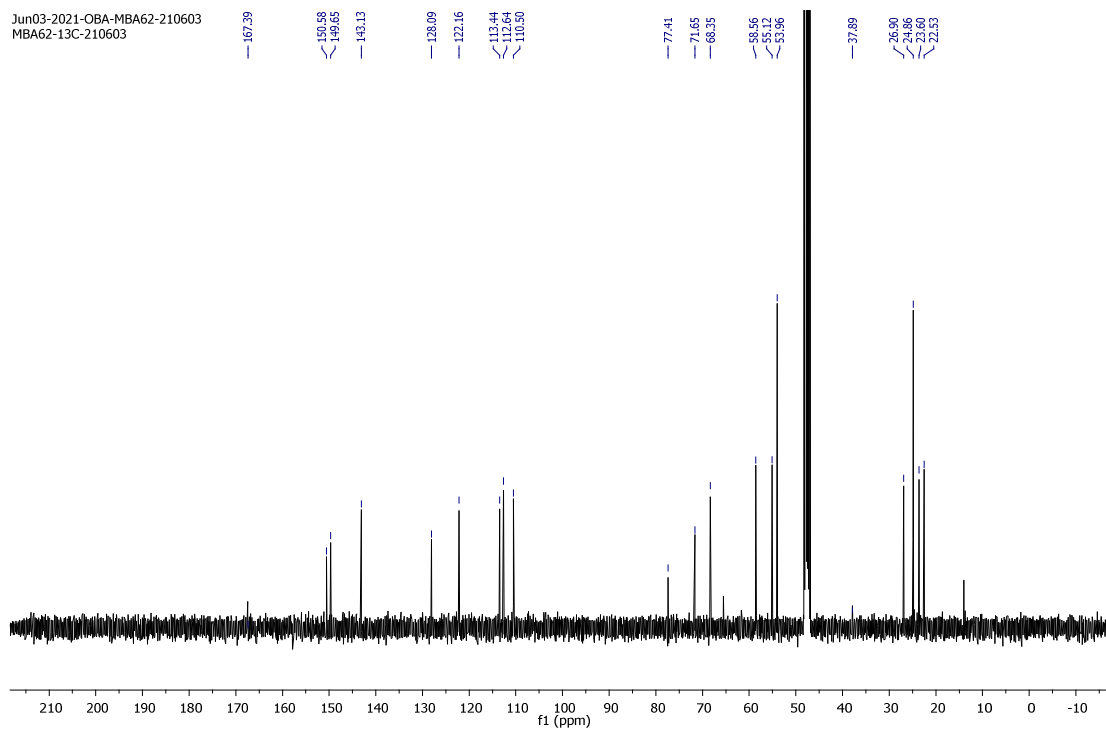

## 2D COSY NMR

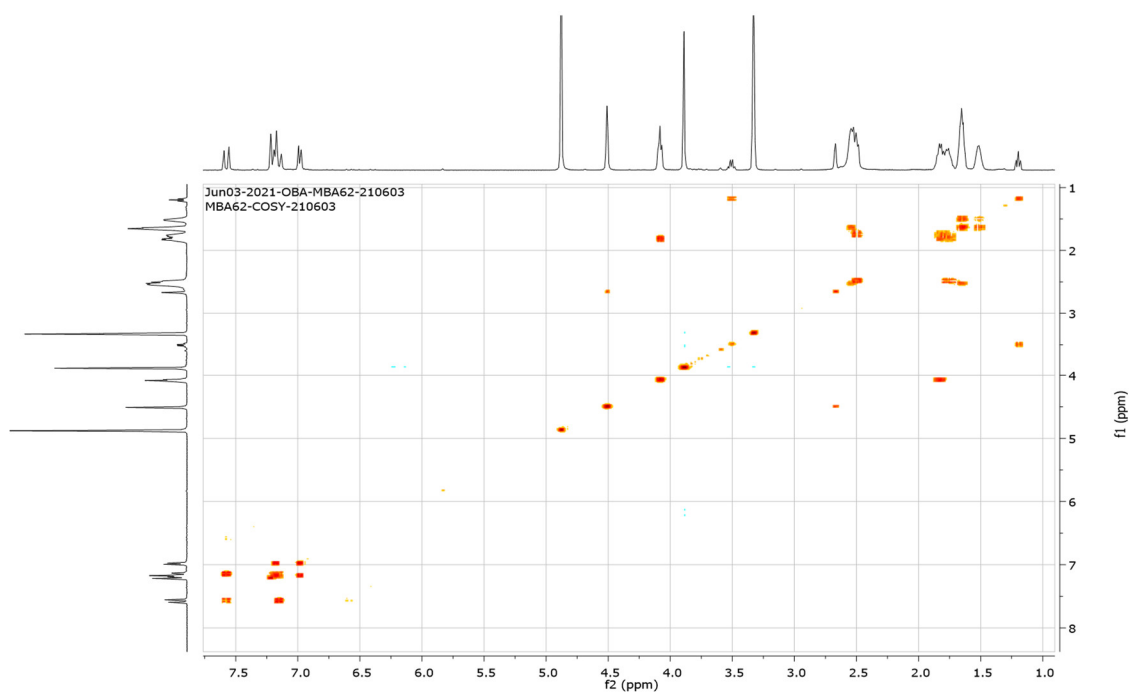

## 2D HSQC NMR

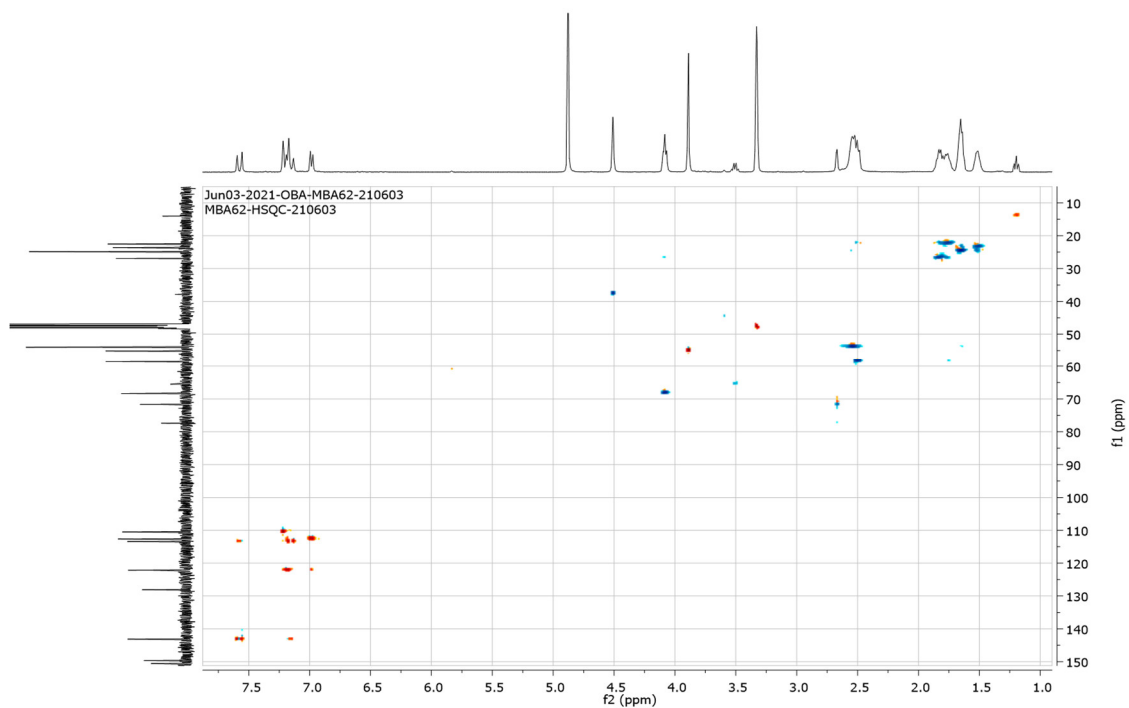

2D HMBC NMR

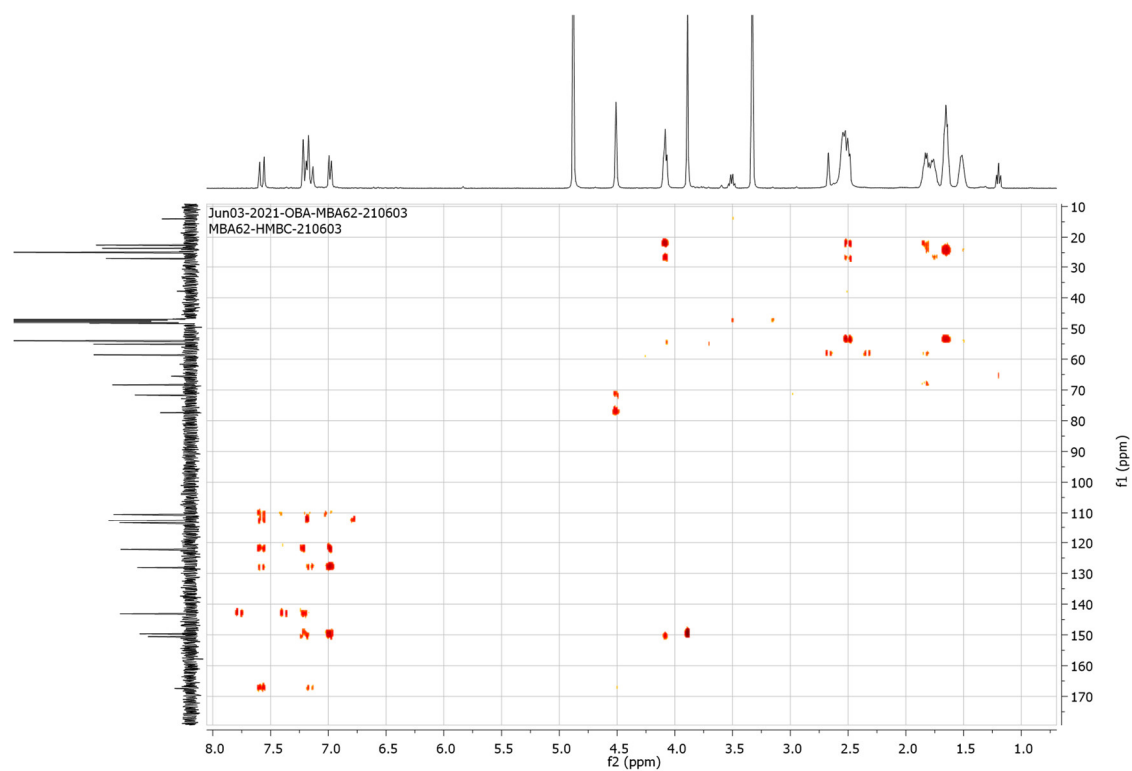

FTIR

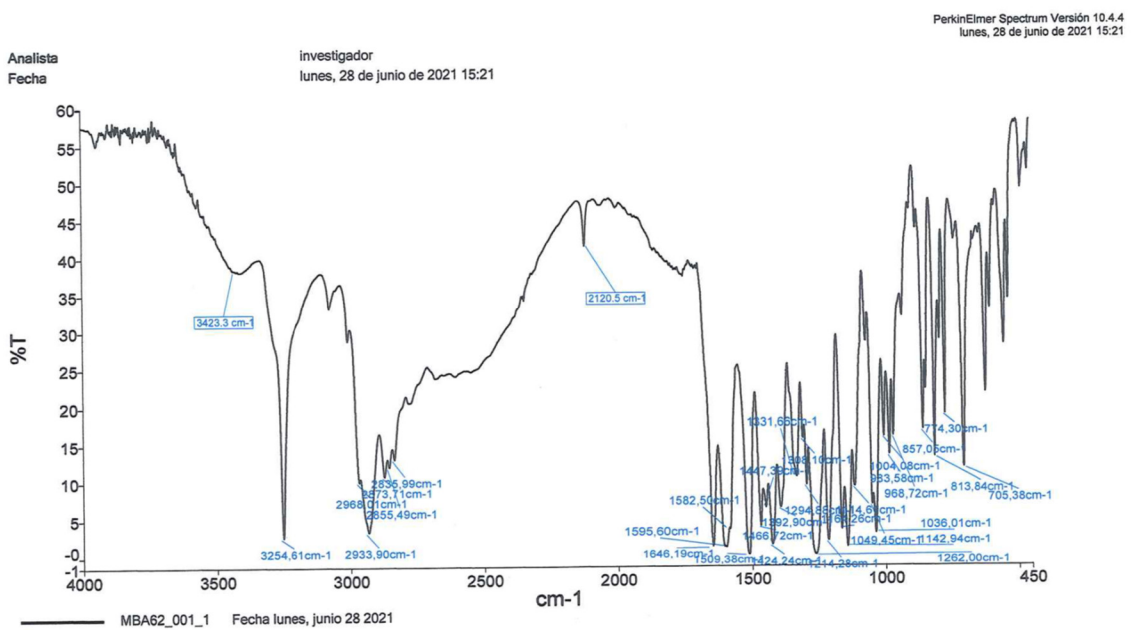



## Qualitative Compound Report

|                        |                      |               |                                 |
|------------------------|----------------------|---------------|---------------------------------|
| Data File              | 538_MBA62_01.d       | Sample Name   | MBA62                           |
| Sample Type            | Sample               | Position      | Vial 15                         |
| Instrument Name        | Instrument 1         | User Name     |                                 |
| Acq Method             | ESI_ACN_75_pos_new.m | Acquired Time | 6/1/2021 1:27:43 PM (UTC+01:00) |
| IRM Calibration Status | Success              | DA Method     | Defecto_modificado.m            |
| Comment                |                      |               |                                 |

|                          |                                 |                       |                             |
|--------------------------|---------------------------------|-----------------------|-----------------------------|
| Sample Group             |                                 | Info.                 |                             |
| User                     | MIREIA TOLEDANO                 | Stream Name           | LC 1                        |
| Acquisition Time (Local) | 6/1/2021 1:27:43 PM (UTC+01:00) | Acquisition SW        | 6200 series TOF/6500 series |
|                          |                                 | Version               | Q-TOF B.08.00 (B8058.3 SP1) |
| QTOF Driver Version      | 8.00.00                         | QTOF Firmware Version | 2.712                       |
| Tune Mass Range          | 1700                            |                       |                             |
| Max.                     |                                 |                       |                             |

### Compound Table

| Compound Label              | RT    | Mass     | Abund   | Formula       | Tgt Mass | Diff (ppm) | Hits (DB) |
|-----------------------------|-------|----------|---------|---------------|----------|------------|-----------|
| Cpd 1: C22 H30 N2 O4; 0.232 | 0.232 | 386.2204 | 9910694 | C22 H30 N2 O4 | 386.2206 | -0.5       | 1         |

| Compound Label              | m/z      | RT    | Algorithm       | Mass     |
|-----------------------------|----------|-------|-----------------|----------|
| Cpd 1: C22 H30 N2 O4; 0.232 | 387.2277 | 0.232 | Find by Formula | 386.2204 |

### MS Zoomed Spectrum

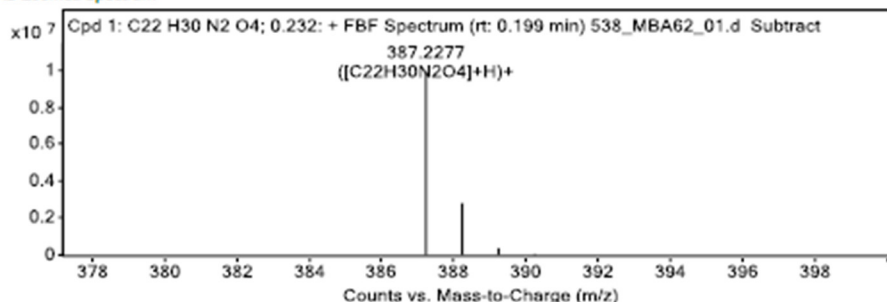

### MS Spectrum Peak List

| m/z      | z | Abund      | Formula    | Ion    |
|----------|---|------------|------------|--------|
| 387.2277 | 1 | 9910694    | C22H30N2O4 | (M+H)+ |
| 388.2304 | 1 | 2801086.25 | C22H30N2O4 | (M+H)+ |
| 389.2357 | 1 | 376968.97  | C22H30N2O4 | (M+H)+ |
| 390.2394 | 1 | 43281.25   | C22H30N2O4 | (M+H)+ |

MS Zoomed Spectrum

## Qualitative Compound Report

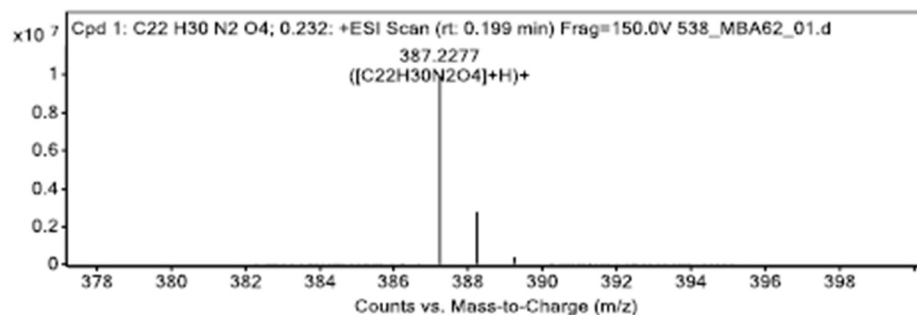

MS Spectrum Peak List

| m/z      | Calc m/z | Diff(ppm) | z | Abund      | Formula                                                       | Ion                |
|----------|----------|-----------|---|------------|---------------------------------------------------------------|--------------------|
| 387.2277 | 387.2278 | -0.38     | 1 | 9910694    | C <sub>22</sub> H <sub>30</sub> N <sub>2</sub> O <sub>4</sub> | (M+H) <sup>+</sup> |
| 388.2304 | 388.2311 | -1.78     | 1 | 2801086.25 | C <sub>22</sub> H <sub>30</sub> N <sub>2</sub> O <sub>4</sub> | (M+H) <sup>+</sup> |
| 389.2357 | 389.2338 | 4.92      | 1 | 376968.97  | C <sub>22</sub> H <sub>30</sub> N <sub>2</sub> O <sub>4</sub> | (M+H) <sup>+</sup> |
| 390.2394 | 390.2364 | 7.45      | 1 | 43281.25   | C <sub>22</sub> H <sub>30</sub> N <sub>2</sub> O <sub>4</sub> | (M+H) <sup>+</sup> |

--- End Of Report ---

## Compound 15

### $^1\text{H}$ NMR

MBA-94

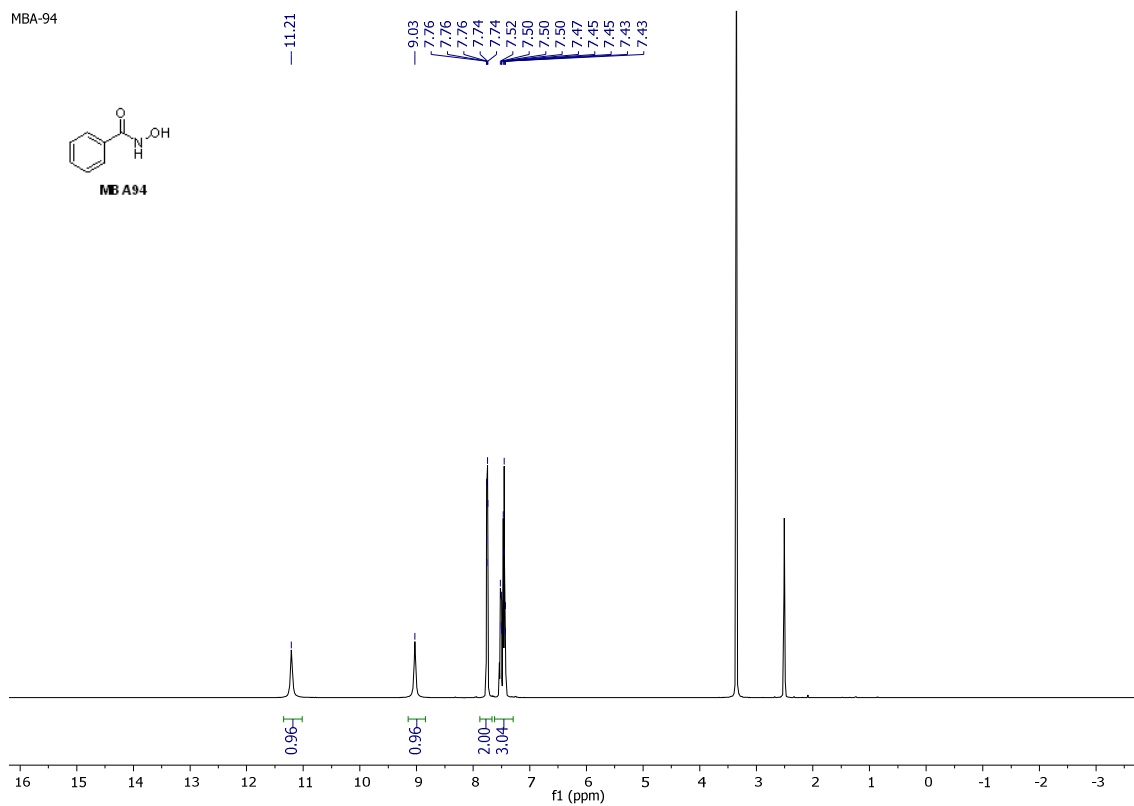

### $^{13}\text{C}$ NMR

MBA94

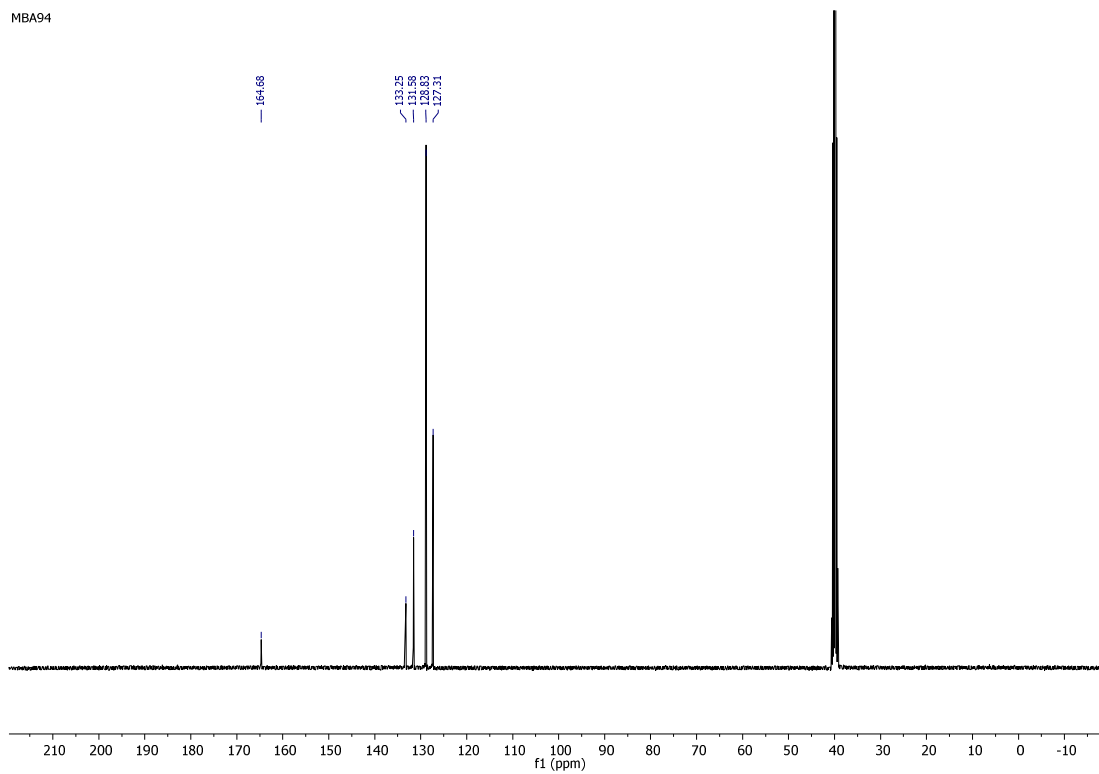

## Qualitative Compound Report

|                        |                |                      |
|------------------------|----------------|----------------------|
| Data File              | 815_MBA94_02.d | Sample Name          |
| Sample Type            |                | Position             |
| Instrument Name        |                | User Name            |
| Acq Method             |                | Acquired Time        |
| IRM Calibration Status | Success        | DA Method            |
| Comment                |                | Defecto_modificado.m |

Status      Acquisition is not yet complete.

### Compound Table

| Compound Label           | RT    | Mass     | Abund  | Formula    | Tgt Mass | Diff (ppm) | Hits (DB) |
|--------------------------|-------|----------|--------|------------|----------|------------|-----------|
| Cpd 1: C7 H7 N O2; 0.251 | 0.251 | 137.0478 | 914665 | C7 H7 N O2 | 137.0477 | 0.59       | 1         |

| Compound Label           | m/z      | RT    | Algorithm       | Mass     |
|--------------------------|----------|-------|-----------------|----------|
| Cpd 1: C7 H7 N O2; 0.251 | 138.0548 | 0.251 | Find by Formula | 137.0478 |

### MS Zoomed Spectrum

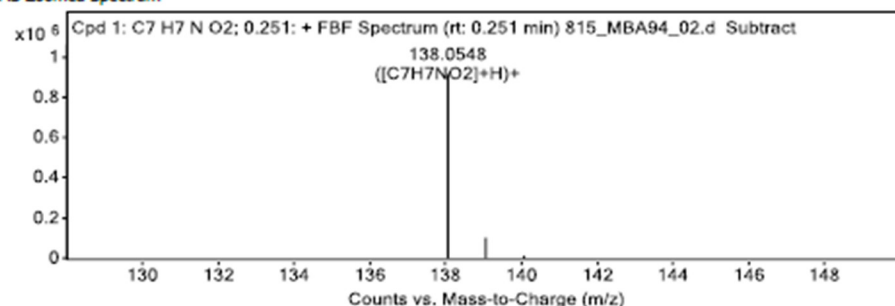

### MS Spectrum Peak List

| m/z      | z | Abund     | Formula | Ion    |
|----------|---|-----------|---------|--------|
| 138.0548 | 1 | 914664.94 | C7H7NO2 | (M+H)+ |
| 139.0594 | 1 | 102169.3  | C7H7NO2 | (M+H)+ |
| 140.0681 | 1 | 11388     | C7H7NO2 | (M+H)+ |

### MS Zoomed Spectrum

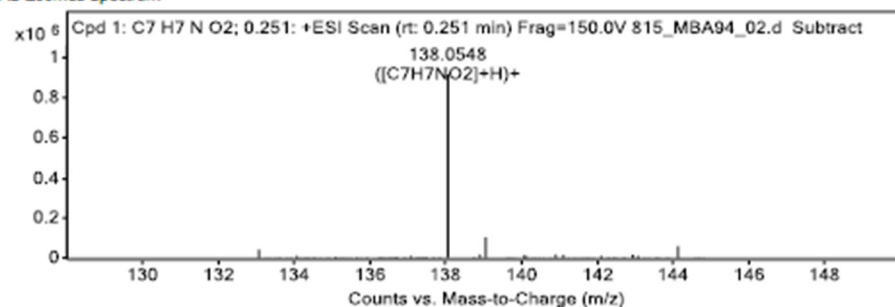

### MS Spectrum Peak List

| m/z      | Calc m/z | Diff(ppm) | z | Abund     | Formula | Ion    |
|----------|----------|-----------|---|-----------|---------|--------|
| 138.0548 | 138.055  | -1.18     | 1 | 914664.94 | C7H7NO2 | (M+H)+ |
| 139.0594 | 139.0581 | 9.77      | 1 | 102169.3  | C7H7NO2 | (M+H)+ |

## Qualitative Compound Report

---

|          |        |       |   |       |         |        |
|----------|--------|-------|---|-------|---------|--------|
| 140.0681 | 140.06 | 57.93 | 1 | 11388 | C7H7NO2 | (M+H)+ |
|----------|--------|-------|---|-------|---------|--------|

--- End Of Report ---

## FTIR

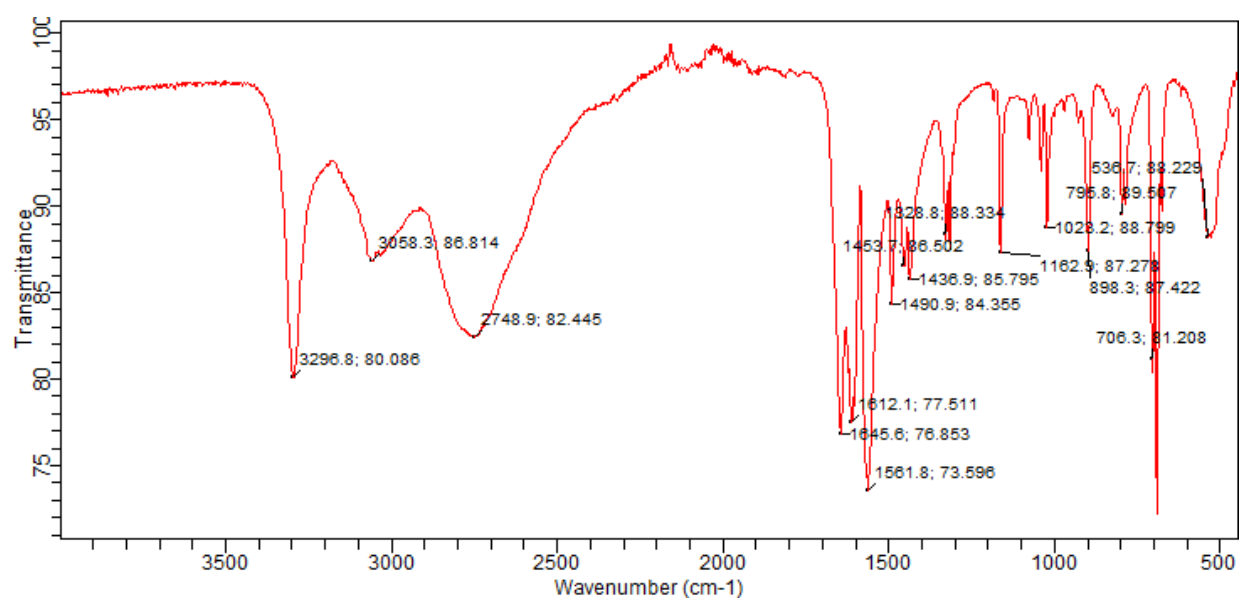

## Compound 16

### $^1\text{H}$ NMR

MBA-47

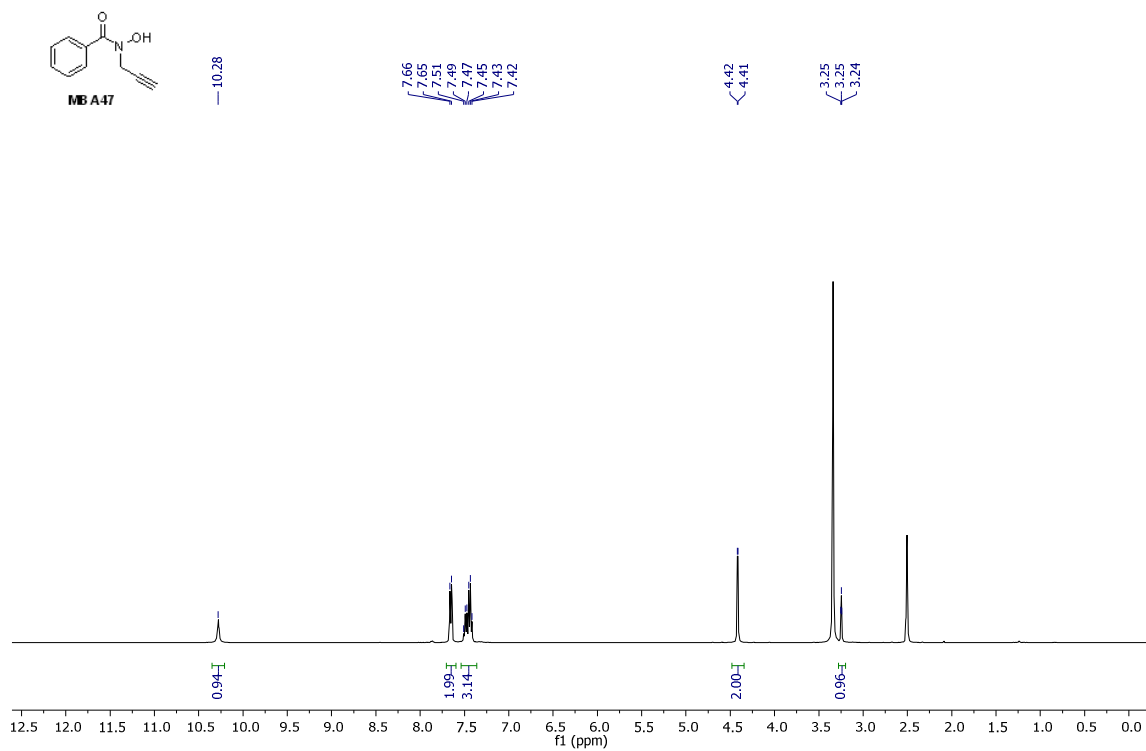

### $^{13}\text{C}$ NMR

MBA47

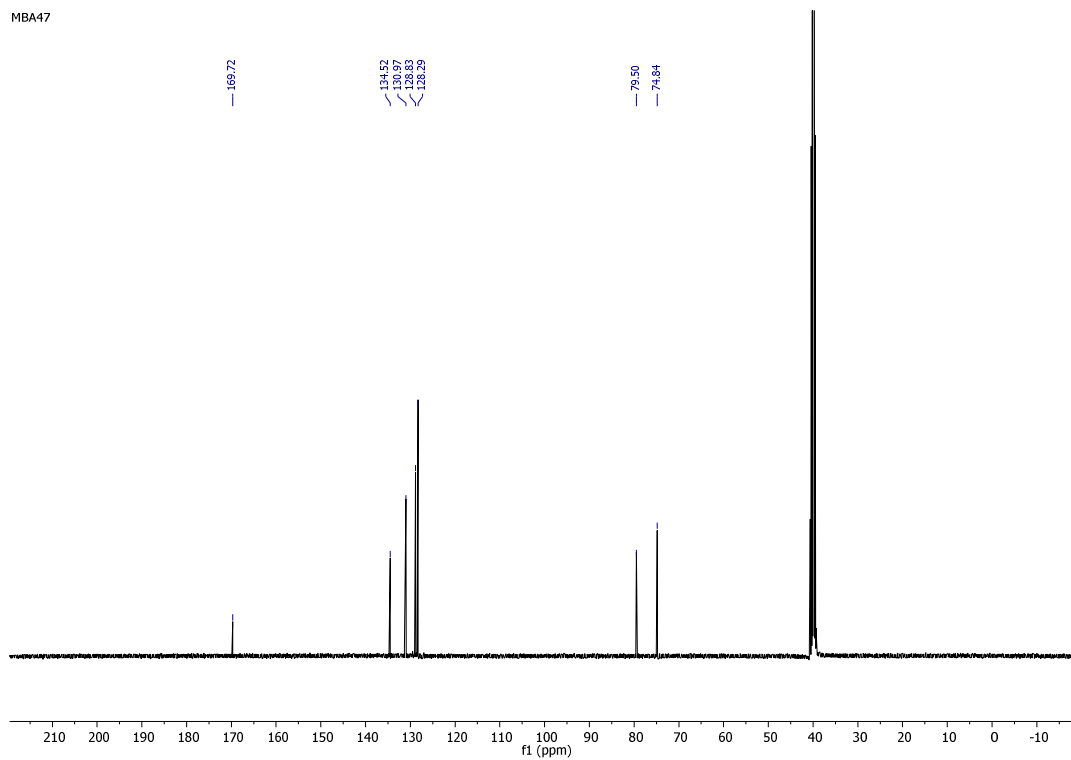

## Qualitative Compound Report

|                        |                      |               |                                  |
|------------------------|----------------------|---------------|----------------------------------|
| Data File              | 814_MBA47_01.d       | Sample Name   | MBA47                            |
| Sample Type            | Sample               | Position      | Vial 7                           |
| Instrument Name        | Instrument 1         | User Name     |                                  |
| Acq Method             | ESI_ACN_75_pos_new.m | Acquired Time | 9/10/2021 3:14:00 PM (UTC+01:00) |
| IRM Calibration Status | Success              | DA Method     | Defecto_modificado.m             |
| Comment                |                      |               |                                  |

|                          |                                  |                       |                             |
|--------------------------|----------------------------------|-----------------------|-----------------------------|
| Sample Group             | Info.                            |                       |                             |
| User                     | MIREIA TOLEDANO                  | Stream Name           | LC 1                        |
| Acquisition Time (Local) | 9/10/2021 3:14:00 PM (UTC+01:00) | Acquisition SW        | 6200 series TOF/6500 series |
|                          |                                  | Version               | Q-TOF B.08.00 (88058.3 SP1) |
| QTOF Driver Version      | 8.00.00                          | QTOF Firmware Version | 2.712                       |
| Tune Mass Range          | 1700                             |                       |                             |
| Max.                     |                                  |                       |                             |

### Compound Table

| Compound Label            | RT    | Mass     | Abund  | Formula     | Tgt Mass | Diff (ppm) | Hits (DB) |
|---------------------------|-------|----------|--------|-------------|----------|------------|-----------|
| Cpd 1: C10 H9 N O2; 0.244 | 0.244 | 175.0626 | 927273 | C10 H9 N O2 | 175.0633 | -4.17      | 1         |

| Compound Label            | m/z      | RT    | Algorithm       | Mass     |
|---------------------------|----------|-------|-----------------|----------|
| Cpd 1: C10 H9 N O2; 0.244 | 176.0696 | 0.244 | Find by Formula | 175.0626 |

### MS Zoomed Spectrum

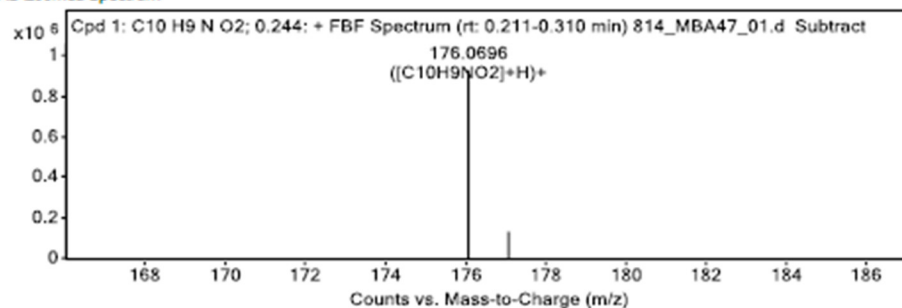

### MS Spectrum Peak List

| m/z      | z | Abund     | Formula  | Ion    |
|----------|---|-----------|----------|--------|
| 176.0696 | 1 | 927273.38 | C10H9NO2 | (M+H)+ |
| 177.0748 | 1 | 129039.83 | C10H9NO2 | (M+H)+ |

MS Zoomed Spectrum



## Qualitative Compound Report

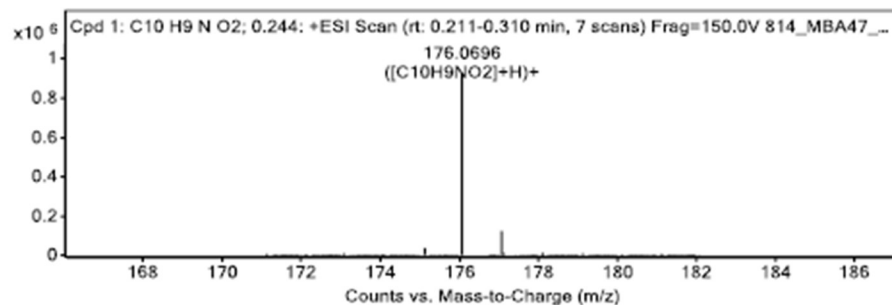

### MS Spectrum Peak List

| m/z      | Calc m/z | Diff(ppm) | z | Abund     | Formula                                        | Ion                |
|----------|----------|-----------|---|-----------|------------------------------------------------|--------------------|
| 176.0696 | 176.0706 | -5.53     | 1 | 927273.38 | C <sub>10</sub> H <sub>9</sub> NO <sub>2</sub> | (M+H) <sup>+</sup> |
| 177.0748 | 177.0738 | 5.75      | 1 | 129039.83 | C <sub>10</sub> H <sub>9</sub> NO <sub>2</sub> | (M+H) <sup>+</sup> |

--- End Of Report ---

## FTIR

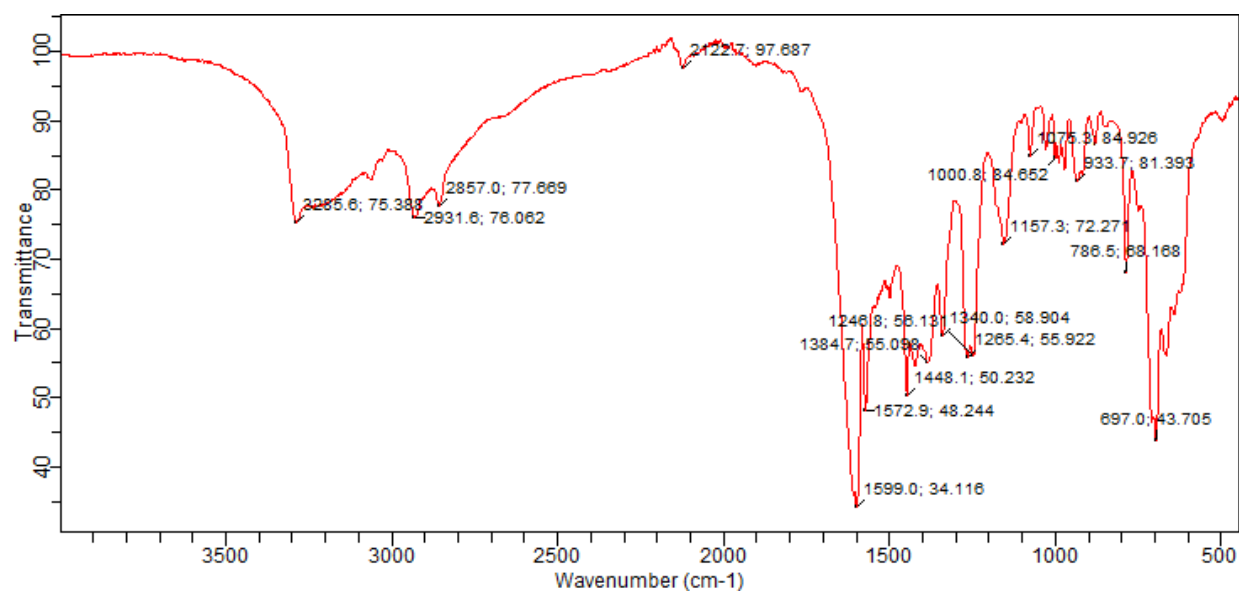

Supplement: s1 [file s1]
